# Supplementary material
Source: publisher figshare collection journal article supplement (https://frontiersin.figshare.com/ndownloader/files/30663161)
Supplement: Supplementary file [file 30663161]

Supplemental Figure S1: Spearman's correlation for macrotraits for A) Winter OSR and B) Spring OSR groups (n=5). PH=plant height (cm), NI= number of flowering inflorescences, NI-1= number of secondary inflorescences, TF= time to flowering (days), FN= number of flowers on the whole plant, PN<sub>M</sub>=number of pods on the main inflorescence, PN<sub>1S</sub>=number of pods on a secondary inflorescence, PN<sub>S</sub>=number of pods on secondary inflorescences, PN= number of pods on the whole plant, PA<sub>M</sub>= pod abortion on the main inflorescence (%), PA<sub>1S</sub>=pod abortion on a secondary inflorescence (%), PA<sub>S</sub>=pod abortion in secondary inflorescences (%), PA=pod abortion in the whole plant (%), TM= time to maturity (days), PL<sub>M</sub>=pod length from 10 pods from the main inflorescence (cm), VL<sub>M</sub>= valve length from 10 pods from the main inflorescence (cm), SNPP<sub>M</sub>= seed number/ pod from 10 pods from the main inflorescence, SA<sub>M</sub>= seed area from 10 pods from the main inflorescence (mm<sup>2</sup>), SC<sub>M</sub>= seed compactness from 10 pods from the main inflorescence, SW<sub>M</sub>= seed weight from 10 pods from the main inflorescence (g), SA= seed area from the whole plant (mm<sup>2</sup>), SC= seed compactness from the whole plant, SACvar= seed area coefficient of variation from whole plant (%), TGW= thousand grain weight (g), SN= estimated total seed number from the whole plant (by TGW), OC= seed oil content from the whole plant (%), SY= seed weight from the whole plant (seed yield, g).

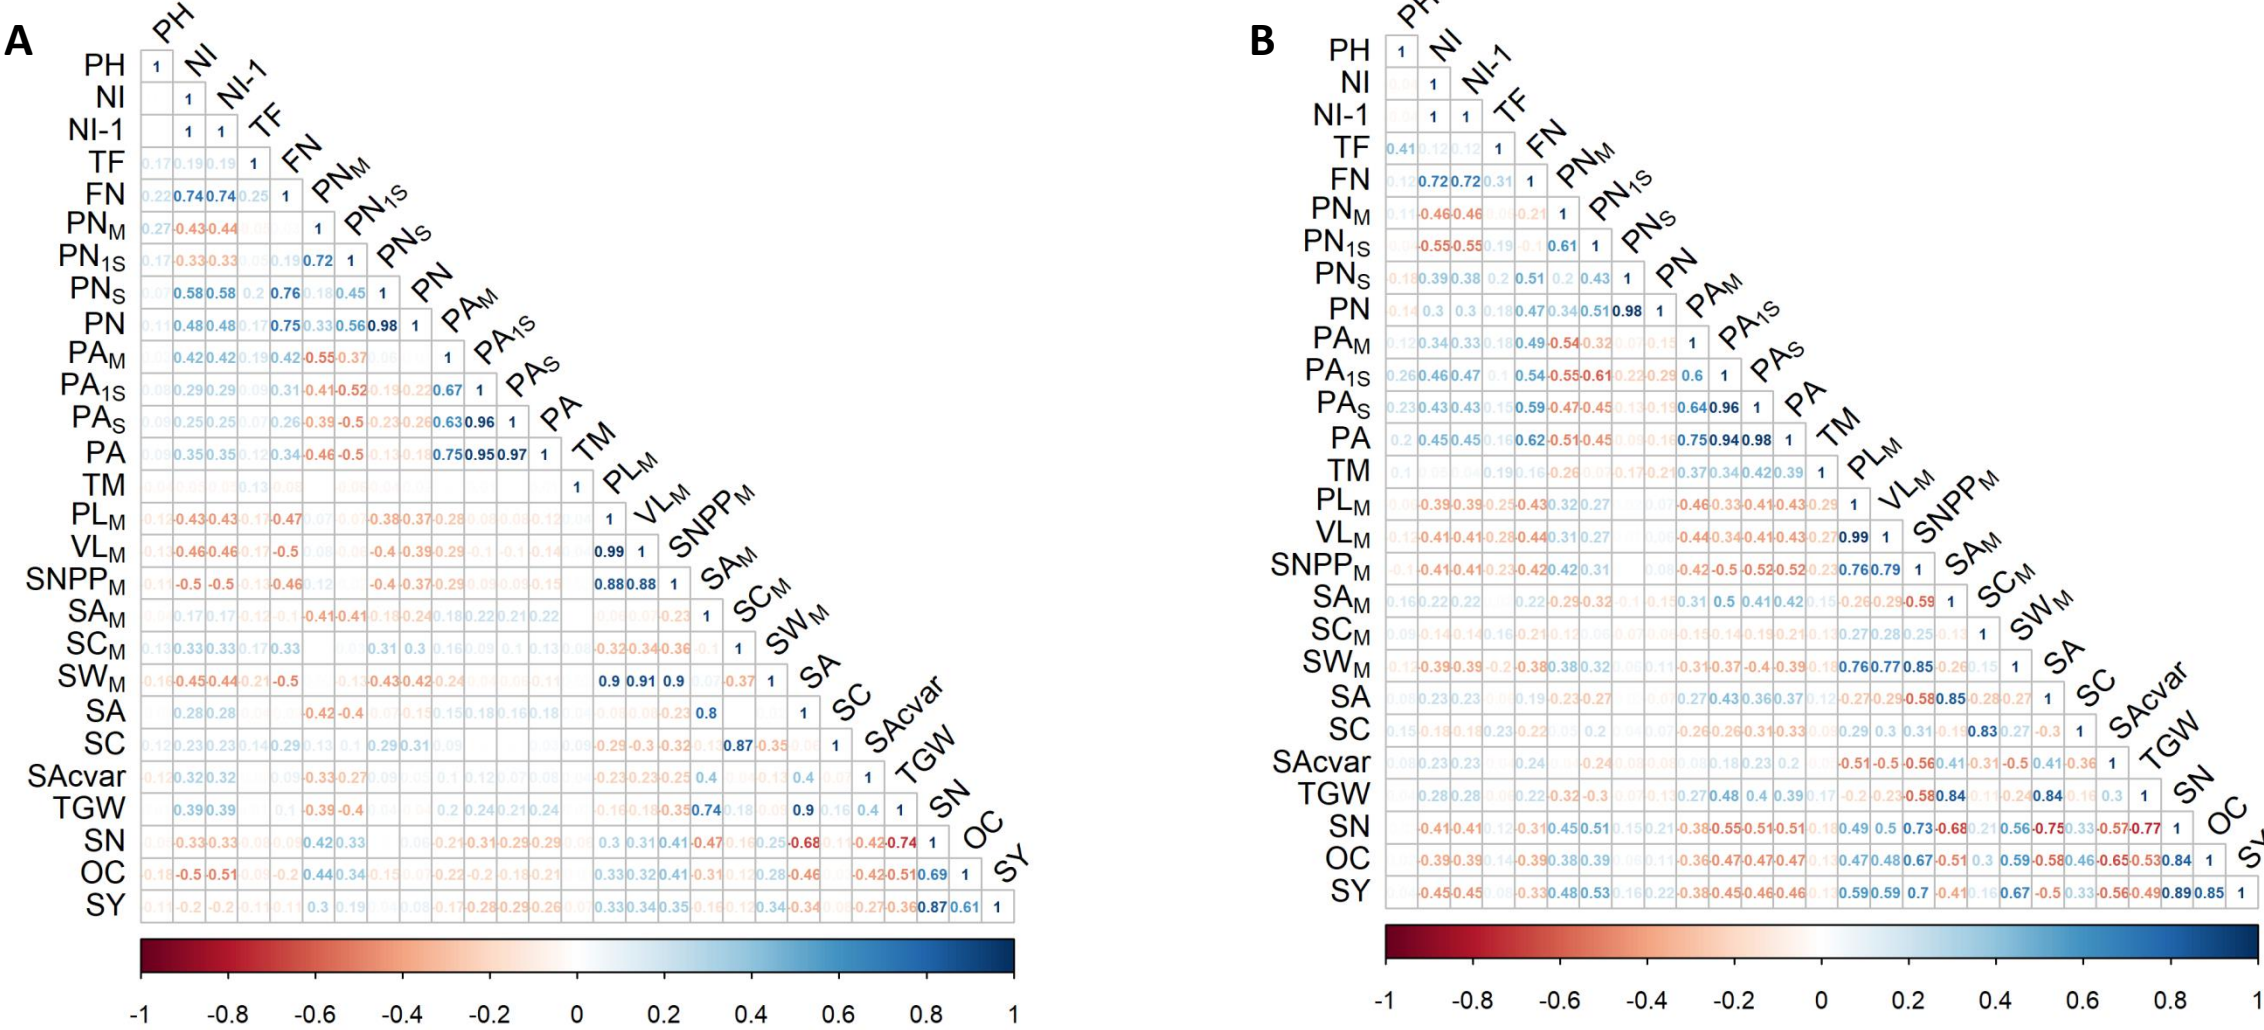





**A**

PH NI NI-1 TF FN PN<sub>M</sub> PN<sub>1S</sub> PN<sub>S</sub> PN PA<sub>M</sub> PA<sub>1S</sub> PA<sub>S</sub> PA TM PL<sub>M</sub> VL<sub>M</sub> SNPP<sub>M</sub> SA<sub>M</sub> SC<sub>M</sub> SW<sub>M</sub> SA SC SACvar TGW SN OC SY

1 0.17 0.16 0.25 0.53 0.16 0.35 0.12 0.15 0.45 0.39 0.42 0.45 0.19 0.38 0.4 0.16 0.43 0.3 0.16 0.14 0.08 0.05 0.31 0.34 0.13

0.17 1 0.1 0.28 0.79 0.16 0.2 0.62 0.59 0.45 0.39 0.42 0.45 0.19 0.38 0.4 0.16 0.43 0.3 0.16 0.14 0.08 0.05 0.31 0.34 0.13

0.16 0.1 1 0.1 0.28 0.79 0.16 0.2 0.62 0.59 0.45 0.39 0.42 0.45 0.19 0.38 0.4 0.16 0.43 0.3 0.16 0.14 0.08 0.05 0.31 0.34 0.13

0.25 0.28 0.1 1 0.1 0.28 0.79 0.16 0.2 0.62 0.59 0.45 0.39 0.42 0.45 0.19 0.38 0.4 0.16 0.43 0.3 0.16 0.14 0.08 0.05 0.31 0.34 0.13

0.53 0.79 0.79 0.28 1 0.1 0.28 0.79 0.16 0.2 0.62 0.59 0.45 0.39 0.42 0.45 0.19 0.38 0.4 0.16 0.43 0.3 0.16 0.14 0.08 0.05 0.31 0.34 0.13

0.16 0.2 0.2 0.28 0.1 1 0.1 0.28 0.79 0.16 0.2 0.62 0.59 0.45 0.39 0.42 0.45 0.19 0.38 0.4 0.16 0.43 0.3 0.16 0.14 0.08 0.05 0.31 0.34 0.13

0.35 0.2 0.2 0.28 0.33 0.5 1 0.1 0.28 0.79 0.16 0.2 0.62 0.59 0.45 0.39 0.42 0.45 0.19 0.38 0.4 0.16 0.43 0.3 0.16 0.14 0.08 0.05 0.31 0.34 0.13

0.12 0.62 0.62 0.27 0.6 0.28 0.66 1 0.1 0.28 0.79 0.16 0.2 0.62 0.59 0.45 0.39 0.42 0.45 0.19 0.38 0.4 0.16 0.43 0.3 0.16 0.14 0.08 0.05 0.31 0.34 0.13

0.15 0.59 0.59 0.61 0.35 0.68 0.99 1 0.1 0.28 0.79 0.16 0.2 0.62 0.59 0.45 0.39 0.42 0.45 0.19 0.38 0.4 0.16 0.43 0.3 0.16 0.14 0.08 0.05 0.31 0.34 0.13

0.45 0.42 0.26 0.22 0.2 0.29 0.28 1 0.1 0.28 0.79 0.16 0.2 0.62 0.59 0.45 0.39 0.42 0.45 0.19 0.38 0.4 0.16 0.43 0.3 0.16 0.14 0.08 0.05 0.31 0.34 0.13

0.39 0.1 0.1 0.13 0.24 0.27 0.37 0.42 0.39 0.57 1 0.1 0.28 0.79 0.16 0.2 0.62 0.59 0.45 0.39 0.42 0.45 0.19 0.38 0.4 0.16 0.43 0.3 0.16 0.14 0.08 0.05 0.31 0.34 0.13

0.42 0.27 0.27 0.15 0.23 0.38 0.44 0.42 0.61 0.95 1 0.1 0.28 0.79 0.16 0.2 0.62 0.59 0.45 0.39 0.42 0.45 0.19 0.38 0.4 0.16 0.43 0.3 0.16 0.14 0.08 0.05 0.31 0.34 0.13

0.45 0.22 0.32 0.27 0.34 0.35 0.33 0.7 0.93 0.97 1 0.1 0.28 0.79 0.16 0.2 0.62 0.59 0.45 0.39 0.42 0.45 0.19 0.38 0.4 0.16 0.43 0.3 0.16 0.14 0.08 0.05 0.31 0.34 0.13

0.19 0.2 0.18 0.3 0.23 0.34 0.42 0.44 0.11 0.28 0.28 1 0.1 0.28 0.79 0.16 0.2 0.62 0.59 0.45 0.39 0.42 0.45 0.19 0.38 0.4 0.16 0.43 0.3 0.16 0.14 0.08 0.05 0.31 0.34 0.13

0.38 0.56 0.56 0.68 0.26 0.16 0.4 0.37 0.32 0.29 0.13 0.22 0.12 1 0.1 0.28 0.79 0.16 0.2 0.62 0.59 0.45 0.39 0.42 0.45 0.19 0.38 0.4 0.16 0.43 0.3 0.16 0.14 0.08 0.05 0.31 0.34 0.13

0.4 0.57 0.57 0.68 0.25 0.14 0.4 0.37 0.31 0.29 0.13 0.24 0.1 0.97 1 0.1 0.28 0.79 0.16 0.2 0.62 0.59 0.45 0.39 0.42 0.45 0.19 0.38 0.4 0.16 0.43 0.3 0.16 0.14 0.08 0.05 0.31 0.34 0.13

0.16 0.58 0.58 0.22 0.51 0.5 0.36 0.3 0.1 0.27 0.23 0.22 0.25 0.79 0.82 1 0.1 0.28 0.79 0.16 0.2 0.62 0.59 0.45 0.39 0.42 0.45 0.19 0.38 0.4 0.16 0.43 0.3 0.16 0.14 0.08 0.05 0.31 0.34 0.13

0.43 0.26 0.27 0.23 0.19 0.34 0.41 0.25 0.1 0.16 0.25 0.27 0.25 0.25 0.27 0.27 1 0.1 0.28 0.79 0.16 0.2 0.62 0.59 0.45 0.39 0.42 0.45 0.19 0.38 0.4 0.16 0.43 0.3 0.16 0.14 0.08 0.05 0.31 0.34 0.13

0.3 0.26 0.26 0.28 0.36 0.26 0.23 0.26 0.18 0.12 0.11 0.25 0.25 0.25 0.16 0.28 1 0.1 0.28 0.79 0.16 0.2 0.62 0.59 0.45 0.39 0.42 0.45 0.19 0.38 0.4 0.16 0.43 0.3 0.16 0.14 0.08 0.05 0.31 0.34 0.13

0.16 0.67 0.67 0.14 0.6 0.4 0.15 0.47 0.42 0.17 0.1 0.14 0.83 0.83 0.92 0.15 1 0.1 0.28 0.79 0.16 0.2 0.62 0.59 0.45 0.39 0.42 0.45 0.19 0.38 0.4 0.16 0.43 0.3 0.16 0.14 0.08 0.05 0.31 0.34 0.13

0.14 0.25 0.25 0.26 0.1 0.26 0.44 0.22 0.22 0.21 0.14 0.15 0.18 0.27 0.16 0.74 0.26 0.26 1 0.1 0.28 0.79 0.16 0.2 0.62 0.59 0.45 0.39 0.42 0.45 0.19 0.38 0.4 0.16 0.43 0.3 0.16 0.14 0.08 0.05 0.31 0.34 0.13

0.08 0.25 0.25 0.16 0.2 0.3 0.19 0.27 0.28 0.17 0.1 0.08 0.12 0.11 0.16 0.39 0.72 0.1 0.38 1 0.1 0.28 0.79 0.16 0.2 0.62 0.59 0.45 0.39 0.42 0.45 0.19 0.38 0.4 0.16 0.43 0.3 0.16 0.14 0.08 0.05 0.31 0.34 0.13

0.08 0.25 0.25 0.16 0.2 0.3 0.19 0.27 0.28 0.17 0.1 0.08 0.12 0.11 0.16 0.39 0.72 0.1 0.38 1 0.1 0.28 0.79 0.16 0.2 0.62 0.59 0.45 0.39 0.42 0

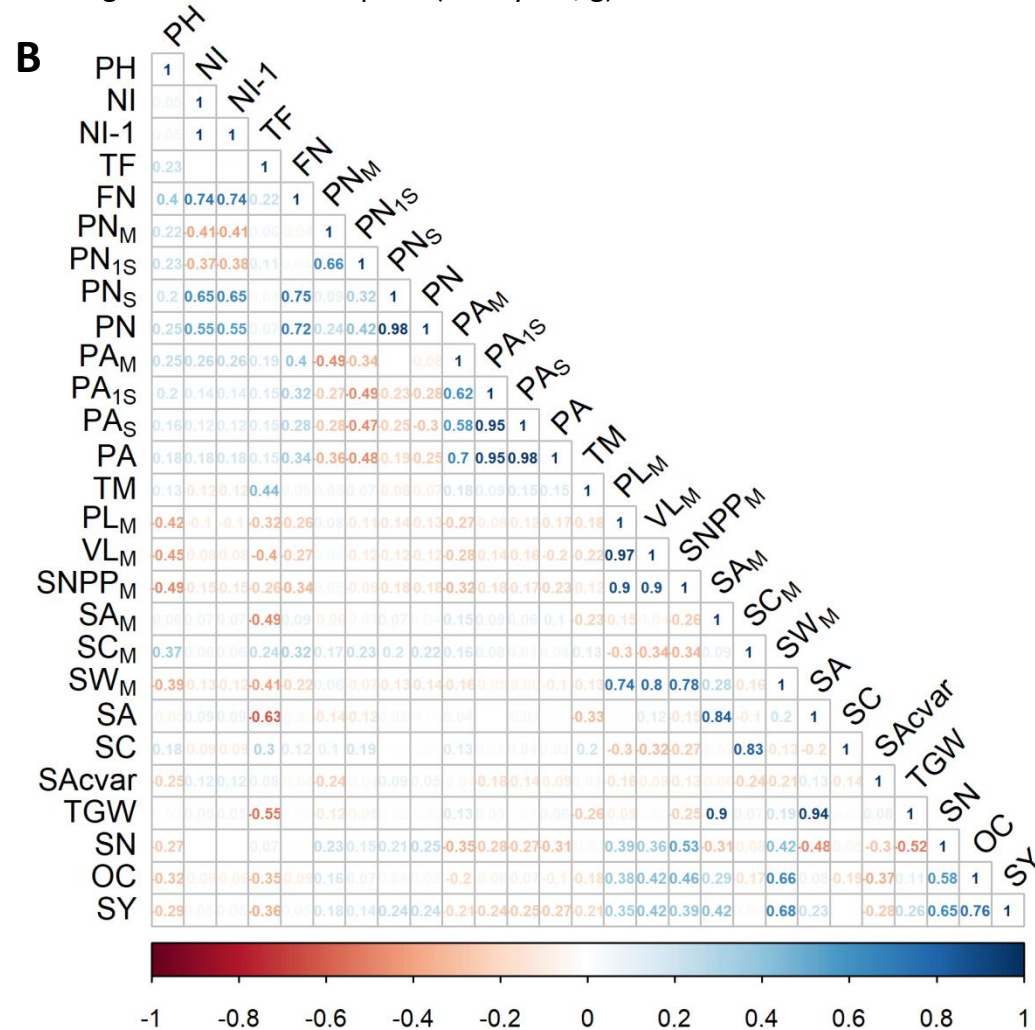

Supplemental Figure S4: Spearman's correlation for alltraits for A) Semiwinter OSR and B) Others groups (n=3). PH=plant height (cm), NI= number of flowering inflorescences, NI-1= number of secondary inflorescences, TF= time to flowering (days), FN= number of flowers on the whole plant, ON=ovule number, OA=ovule area (mm<sup>2</sup>), OAcvar=ovule area coefficient of variation (%), OL= ovary length (mm), GL=gynoecia length (mm), SL= style length (mm), PN<sub>M</sub>=number of pods on the main inflorescence, PN<sub>1s</sub>=number of pods on a secondary inflorescence, PN<sub>s</sub>=number of pods on secondary inflorescences, PN= number of pods on the whole plant, PA<sub>M</sub>= pod abortion on the main inflorescence (%), PA<sub>1s</sub>=pod abortion on a secondary inflorescence (%), PA<sub>s</sub>=pod abortion in secondary inflorescences (%), PA=pod abortion in the whole plant (%), TM= time to maturity (days), PL<sub>M</sub>=pod length from 10 pods from the main inflorescence (cm), VL<sub>M</sub>= valve length from 10 pods from the main inflorescence (cm), BL= beak length (cm), SNPP<sub>M</sub>= seed number/ pod from 10 pods from the main inflorescence, SA<sub>M</sub>= seed area from 10 pods from the main inflorescence (mm<sup>2</sup>), SC<sub>M</sub>= seed compactness from 10 pods from the main inflorescence, SW<sub>M</sub>= seed weight from 10 pods from the main inflorescence (g), SA= seed area from the whole plant (mm<sup>2</sup>), SC= seed compactness from the whole plant, SAcvar= seed area coefficient of variation from whole plant (%), TGW= thousand grain weight (g), SN= estimated total seed number from the whole plant (by TGW), OC= seed oil content from the whole plant (%), SY= seed weight from the whole plant (seed yield, g).

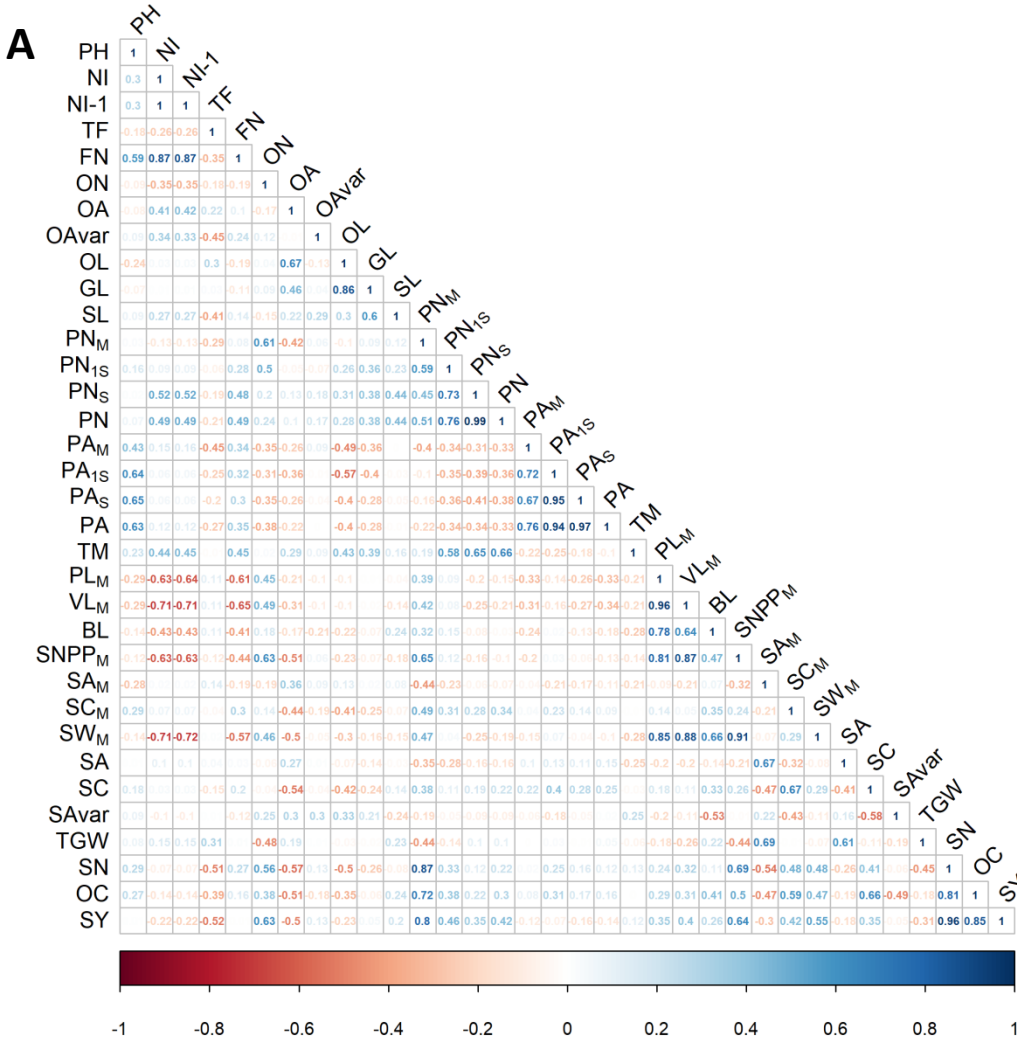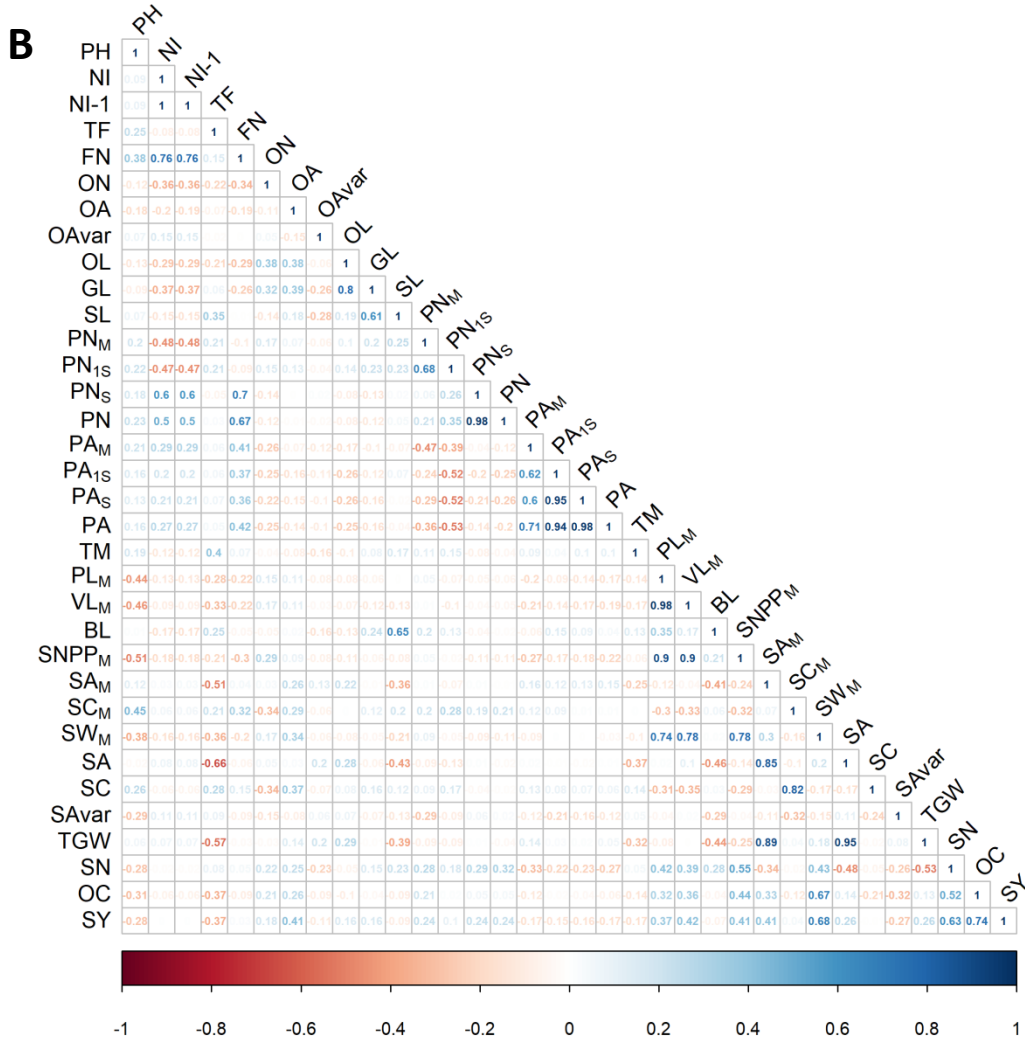

Supplementary File S1: Principal Component (PC) loadings for the significant macrotraits reproductive strategies retained by Winter OSR and Spring OSR groups.

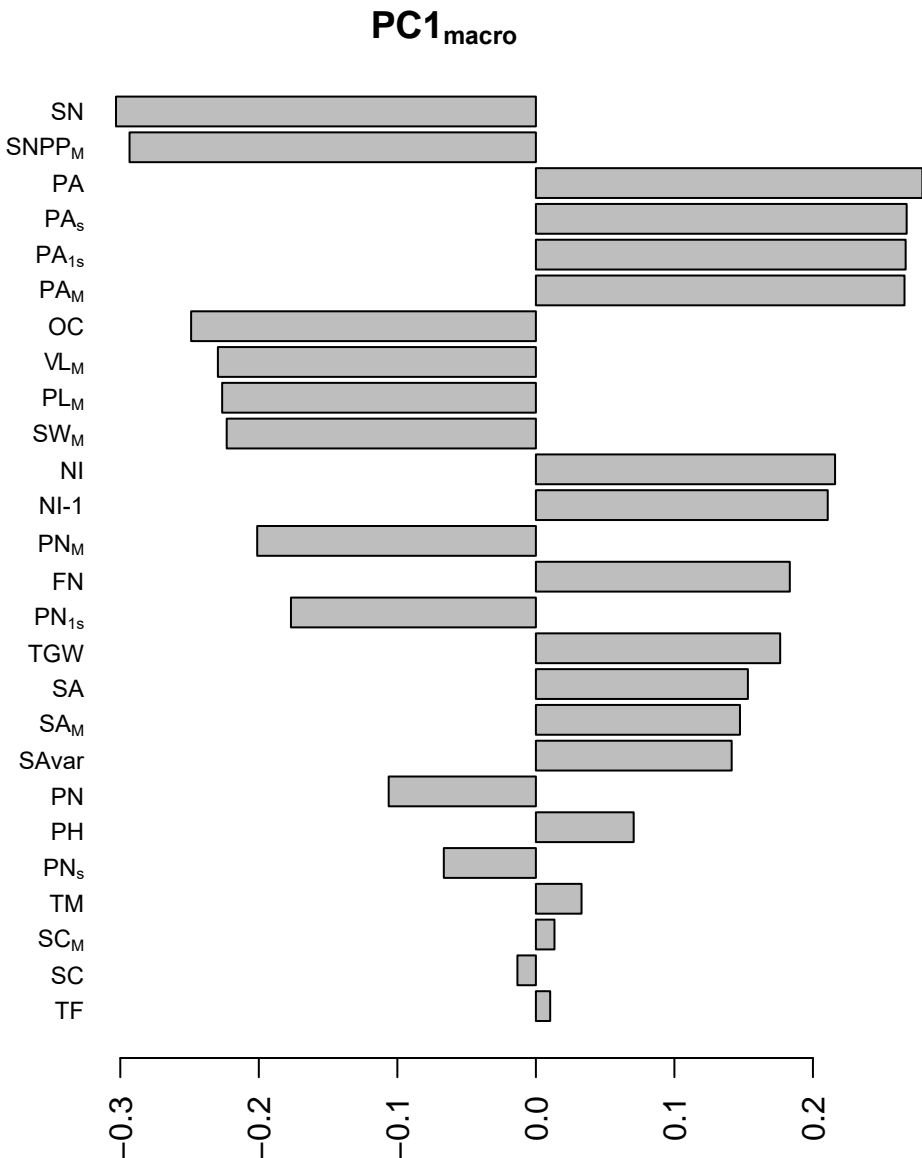

# PC2<sub>macro</sub>

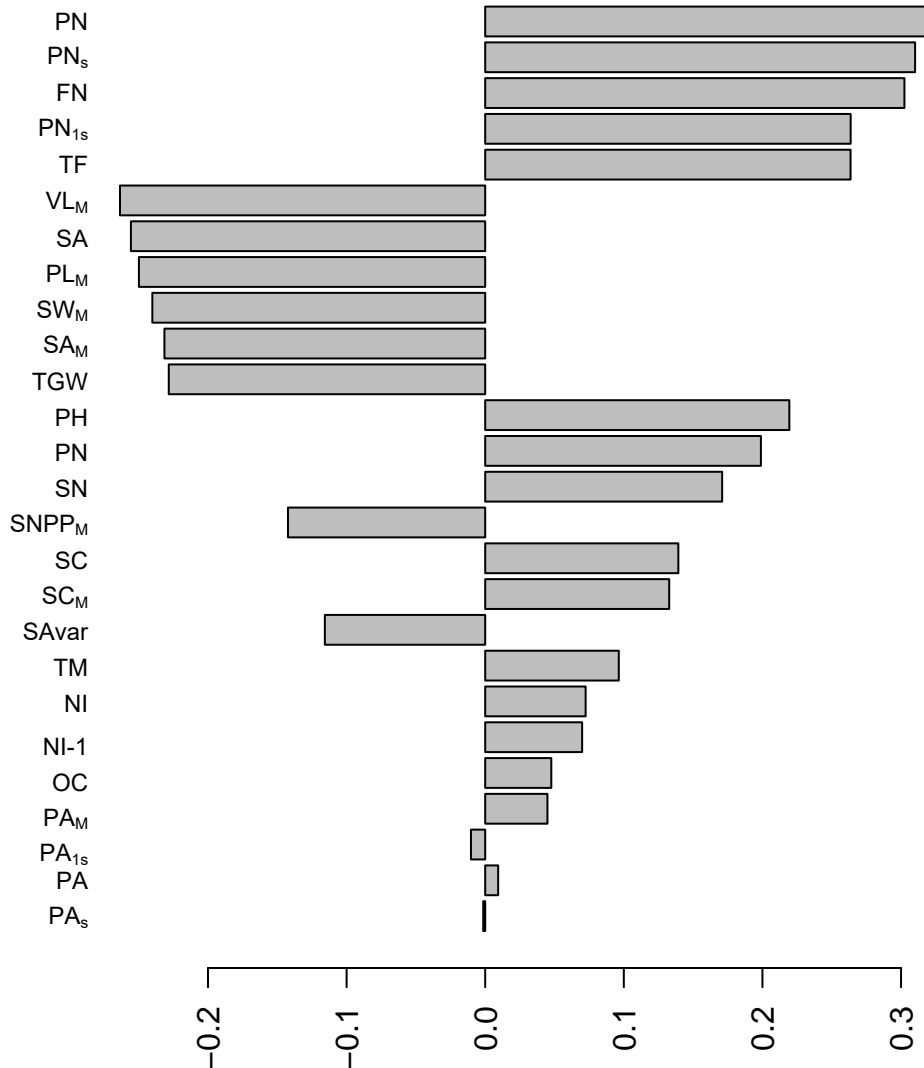

# PC3<sub>macro</sub>

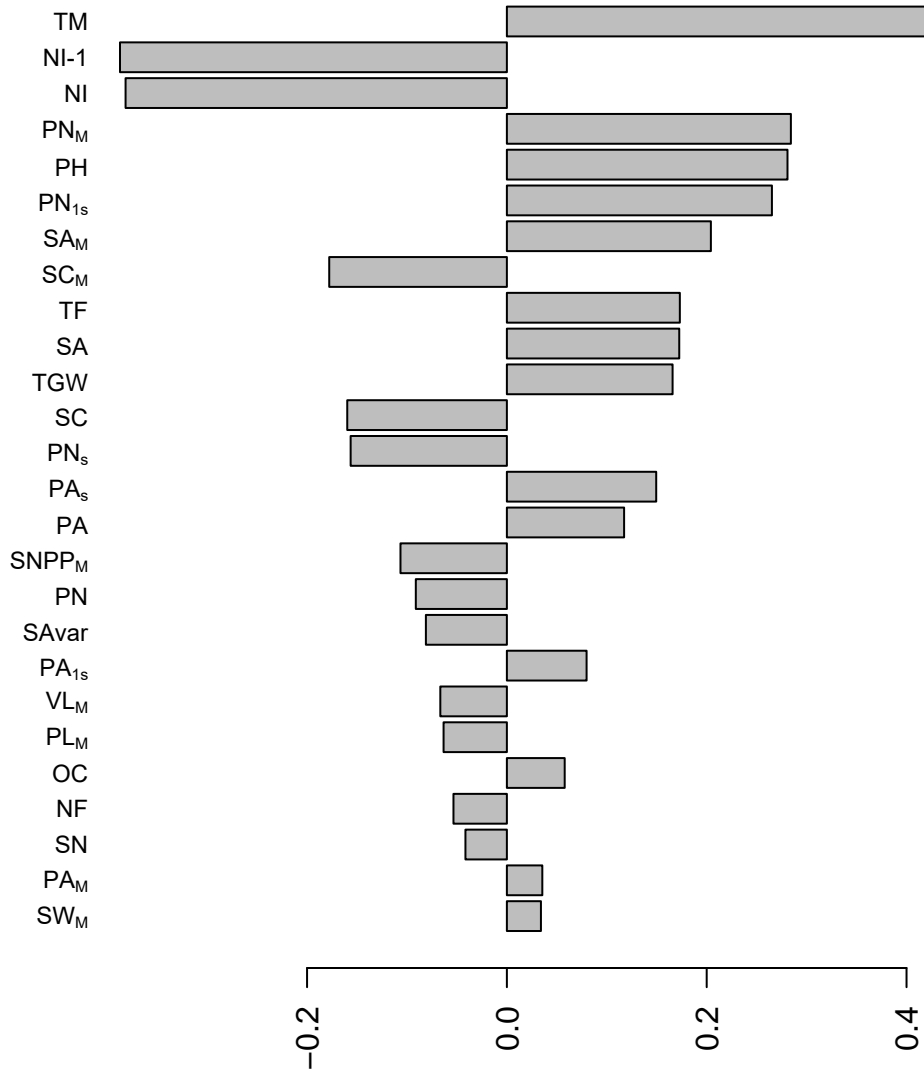

# PC4<sub>macro</sub>

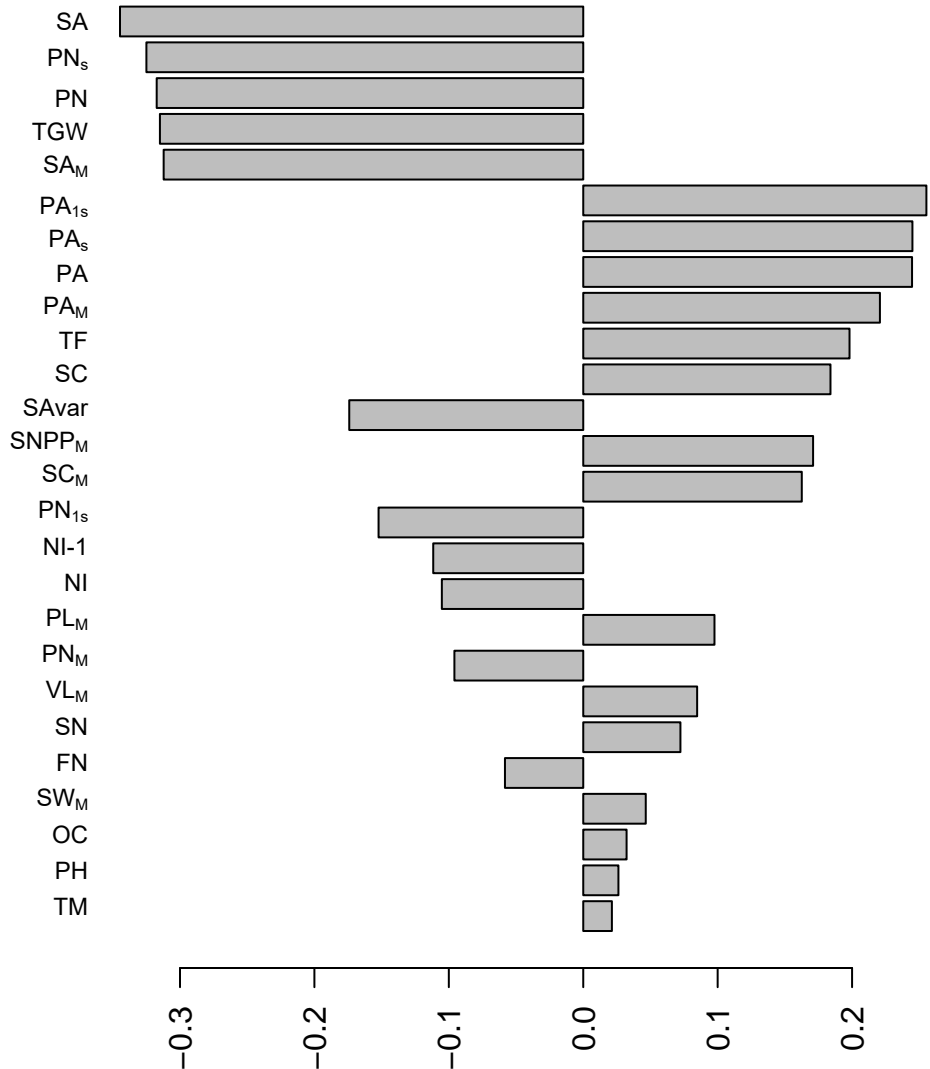



# PC5<sub>macro</sub>

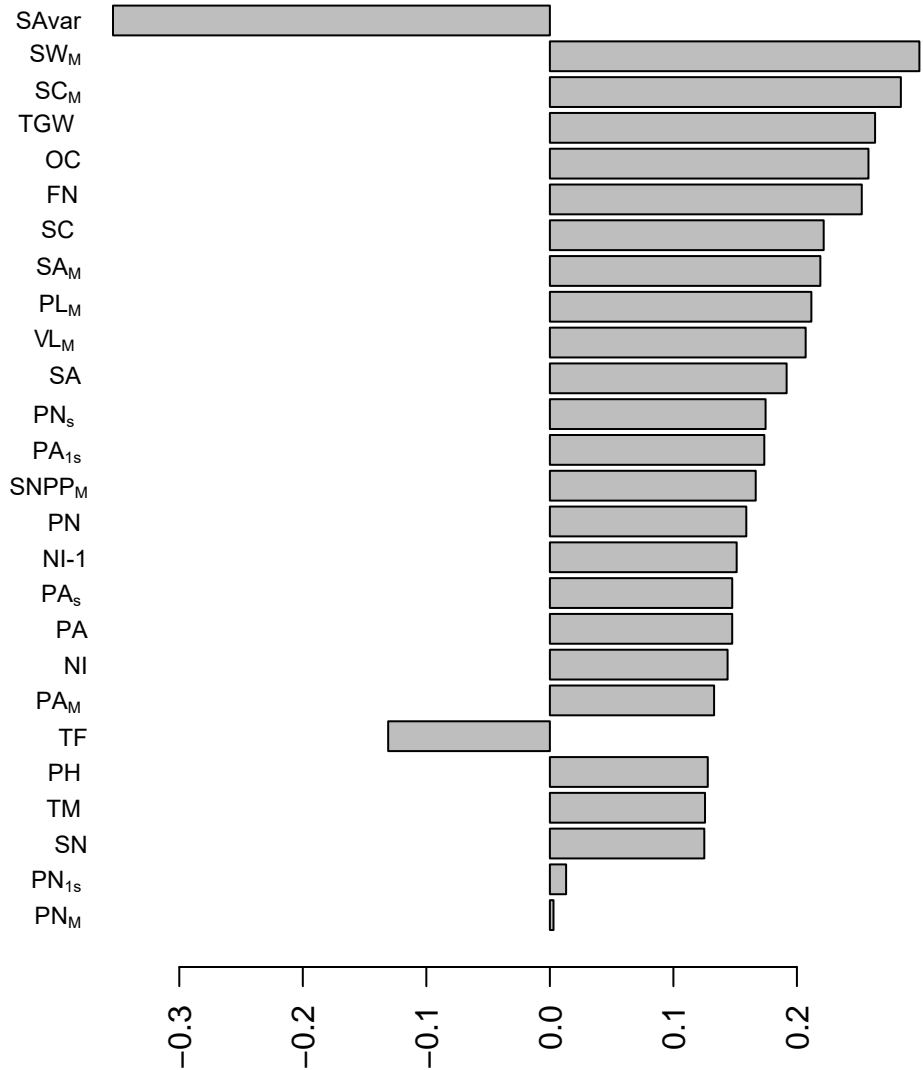

# PC6<sub>macro</sub>

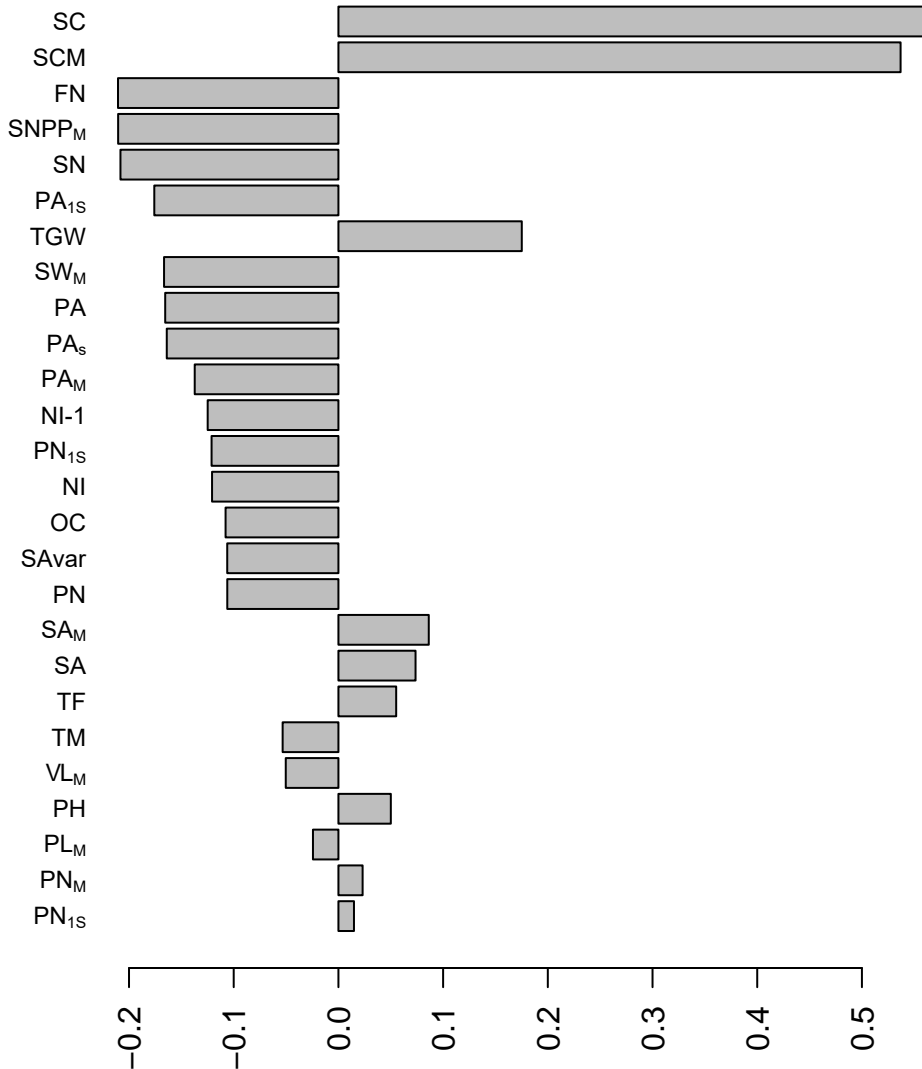

# PC7<sub>macro</sub>

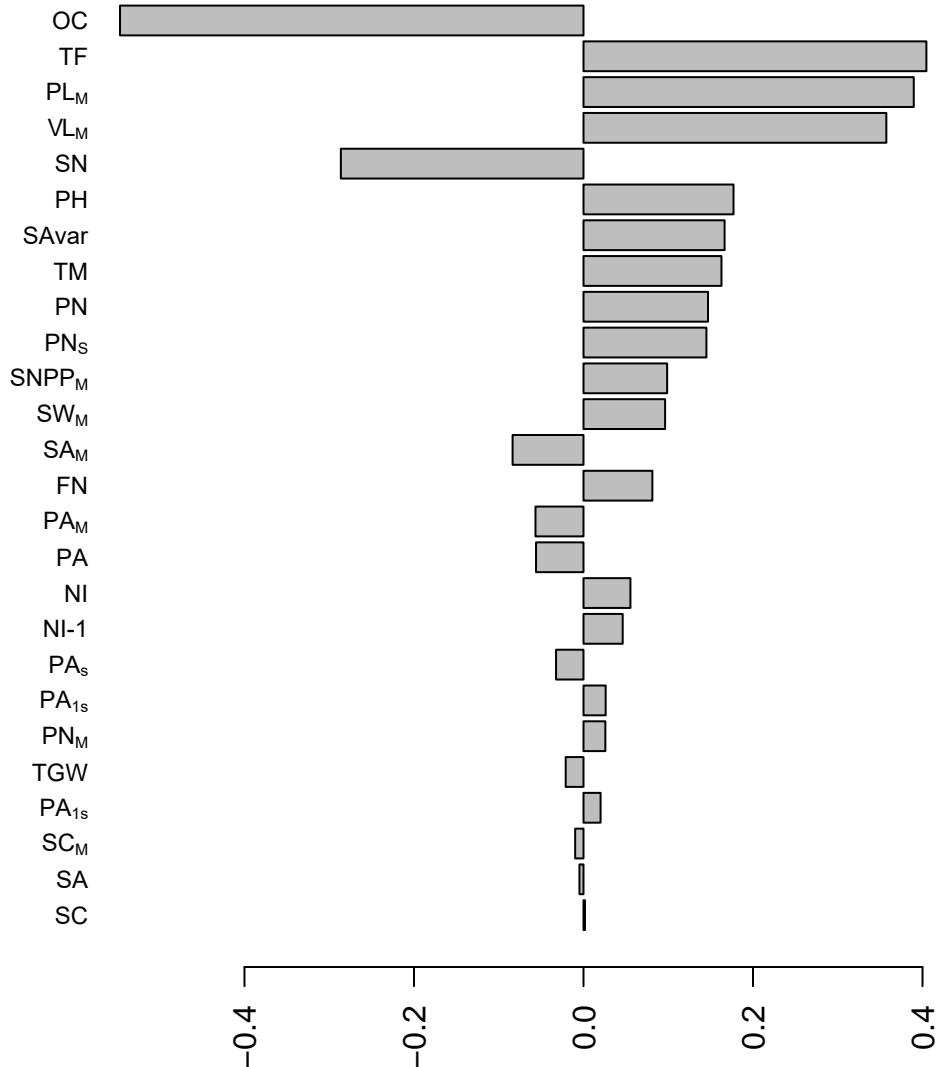

# PC8<sub>macro</sub>

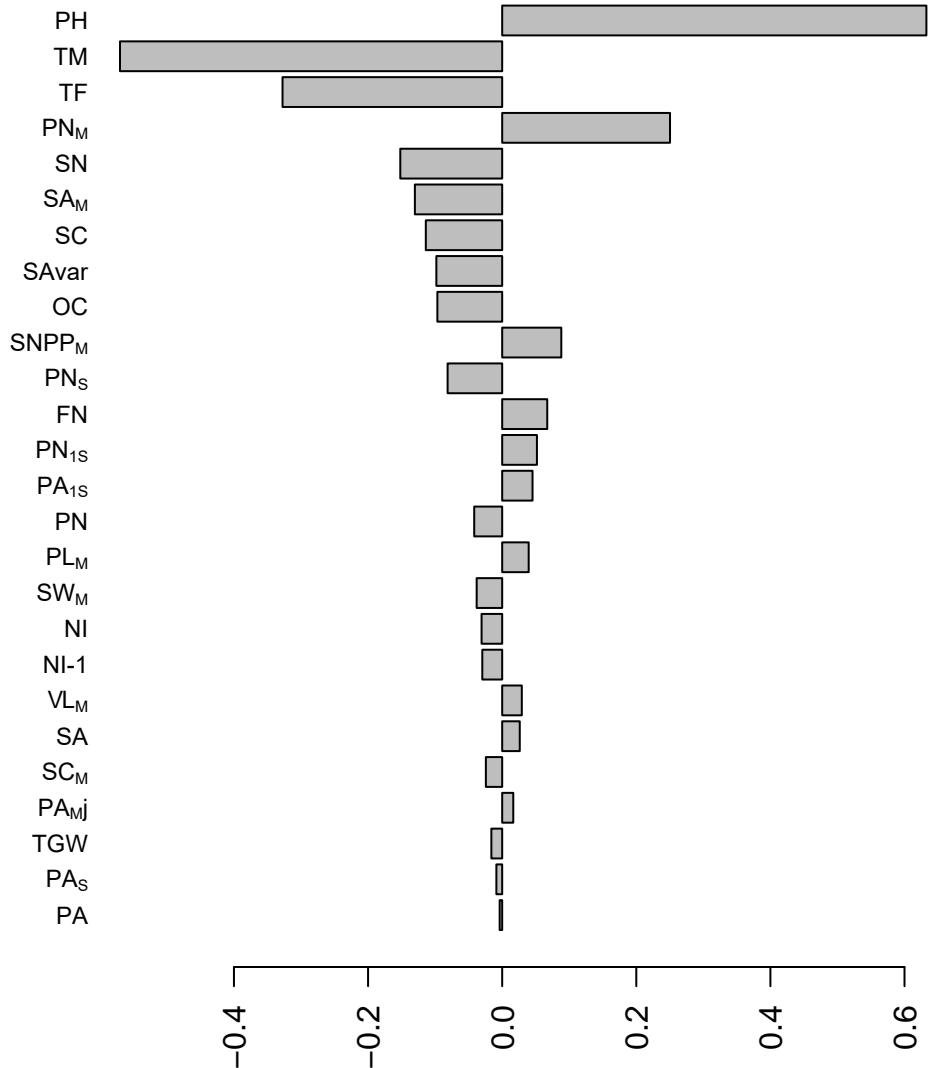

# PC10<sub>macro</sub>

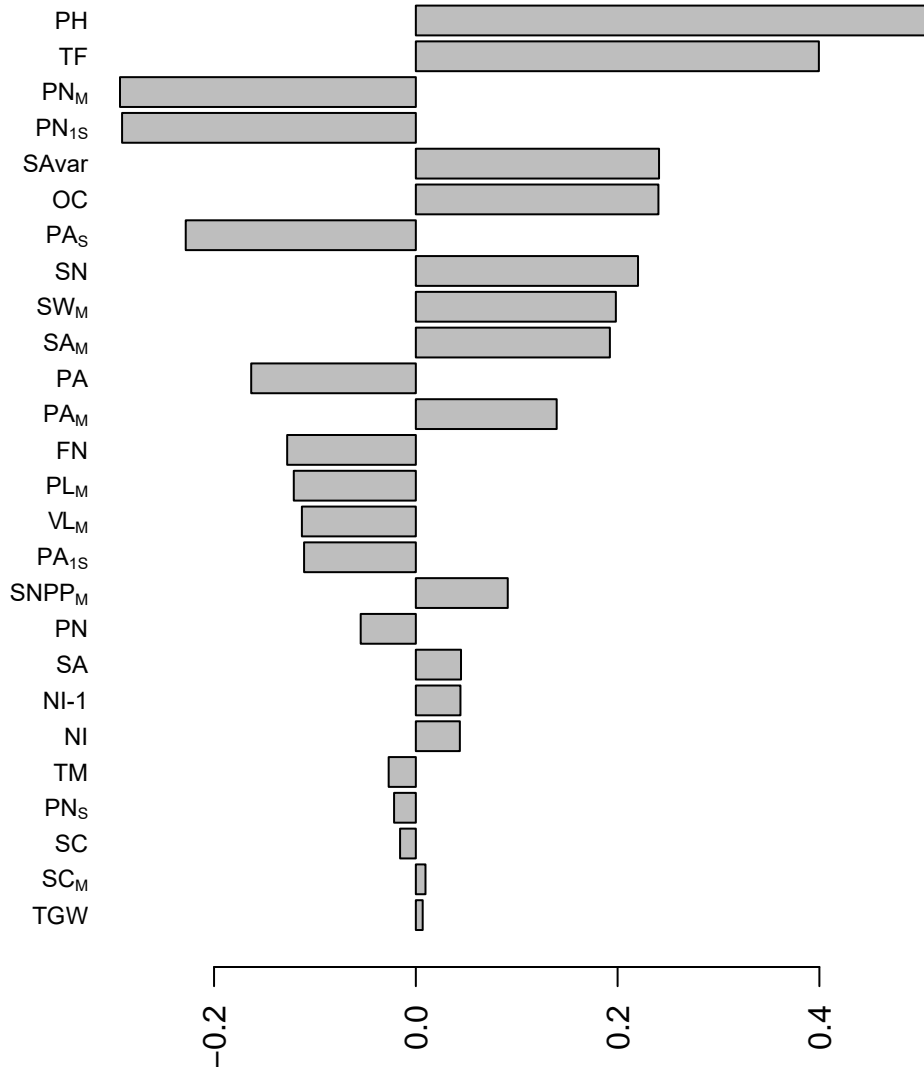

# PC11<sub>macro</sub>

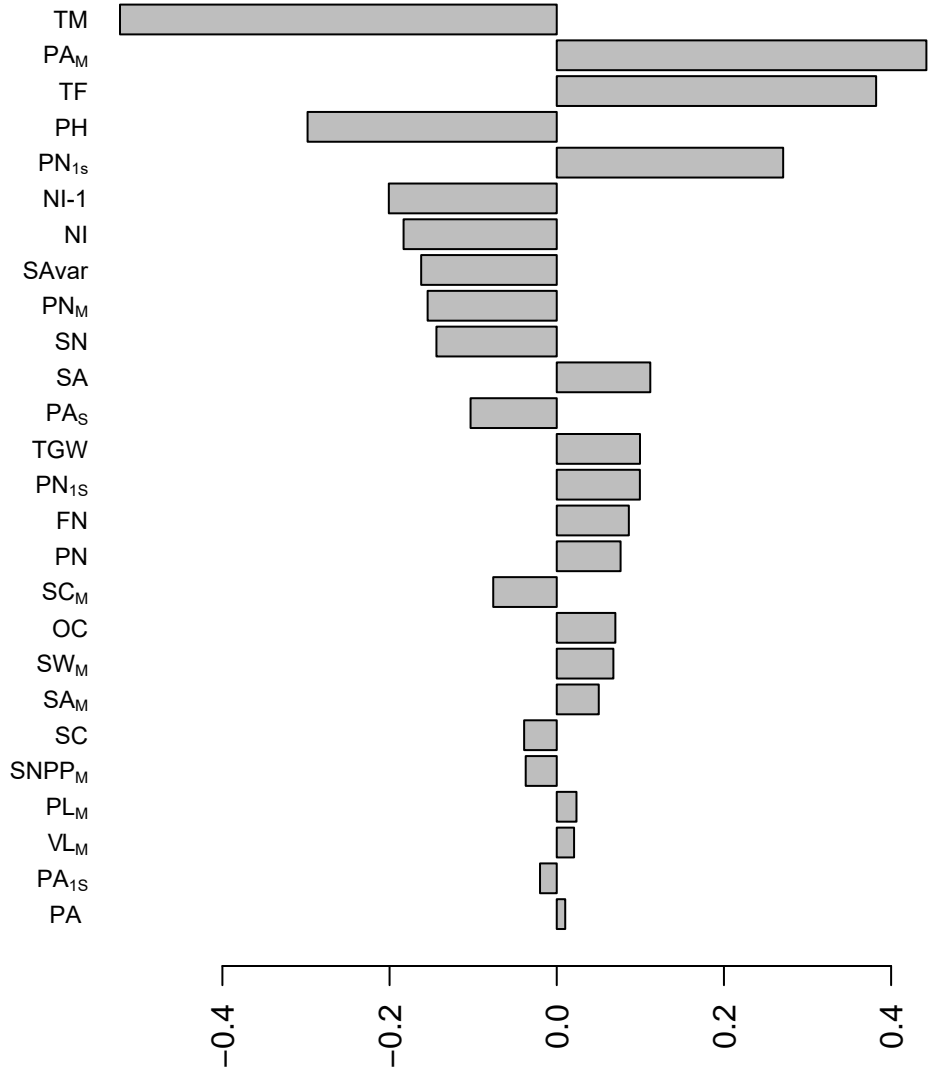



Supplementary File S2: Principal Component (PC) loadings for the significant alltraits reproductive strategies retained by Winter OSR and Spring OSR groups.

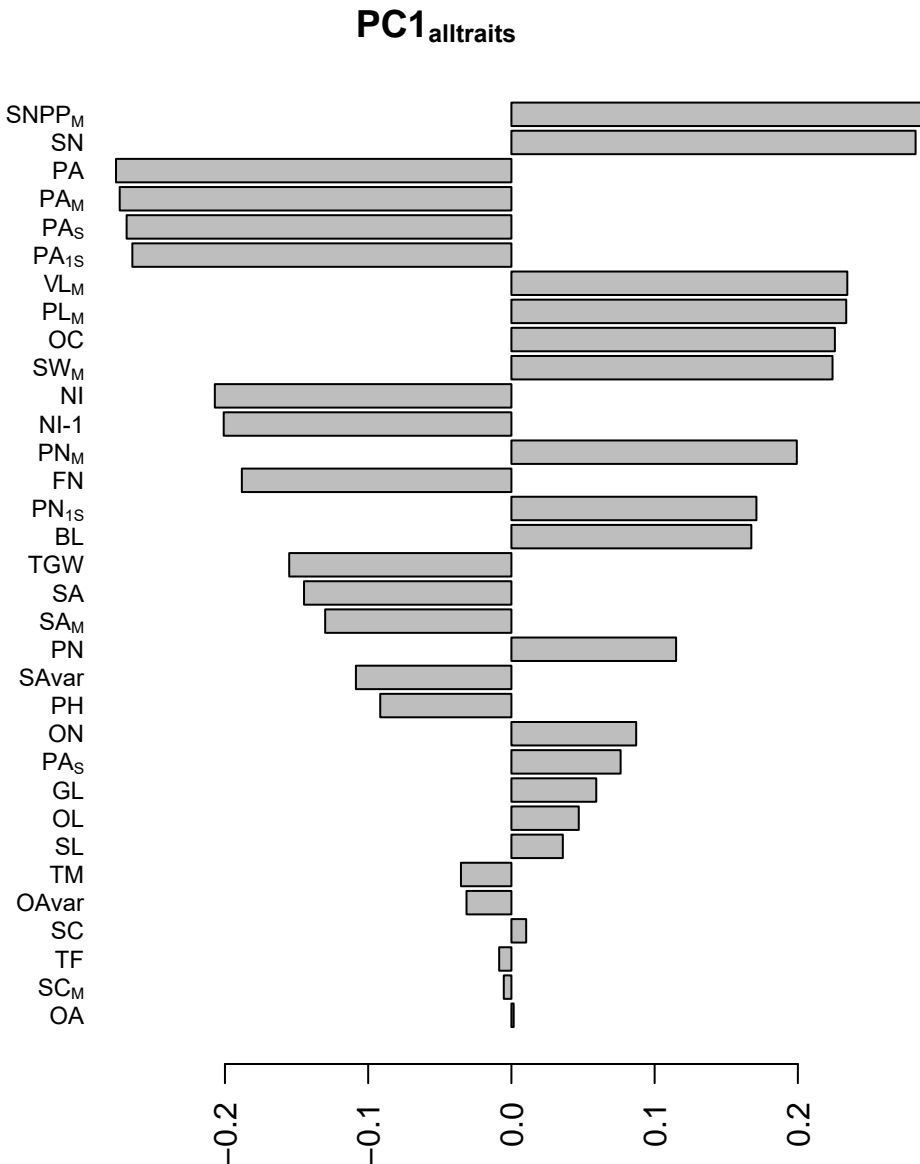

# PC2<sub>alltraits</sub>

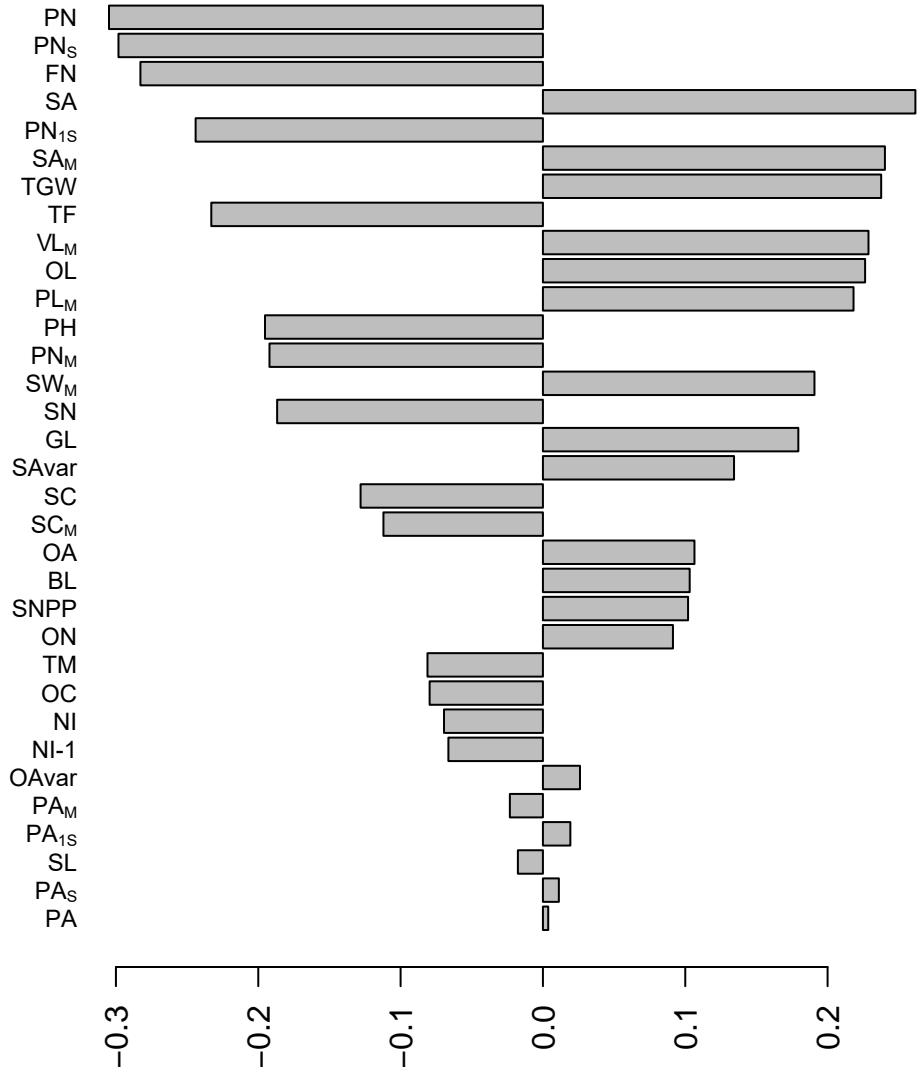

# PC4<sub>alltraits</sub>

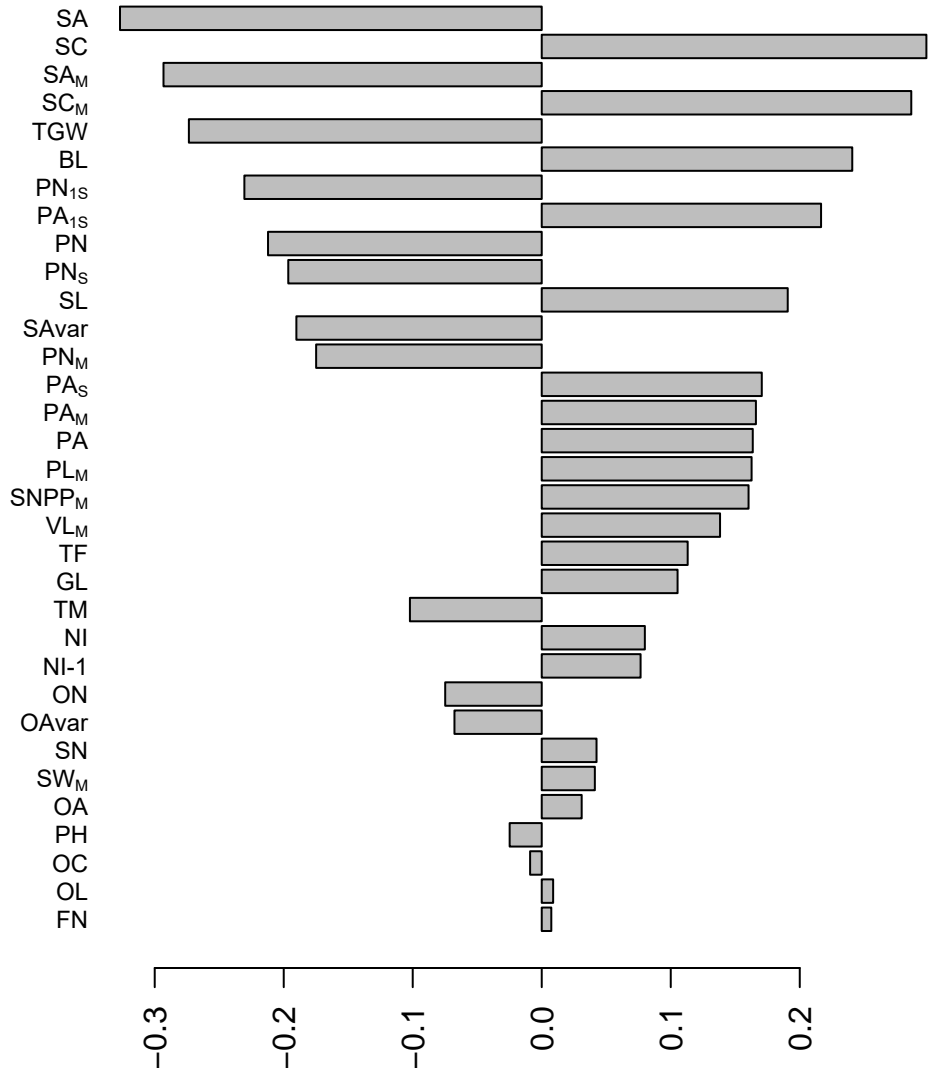

# PC5<sub>alltraits</sub>

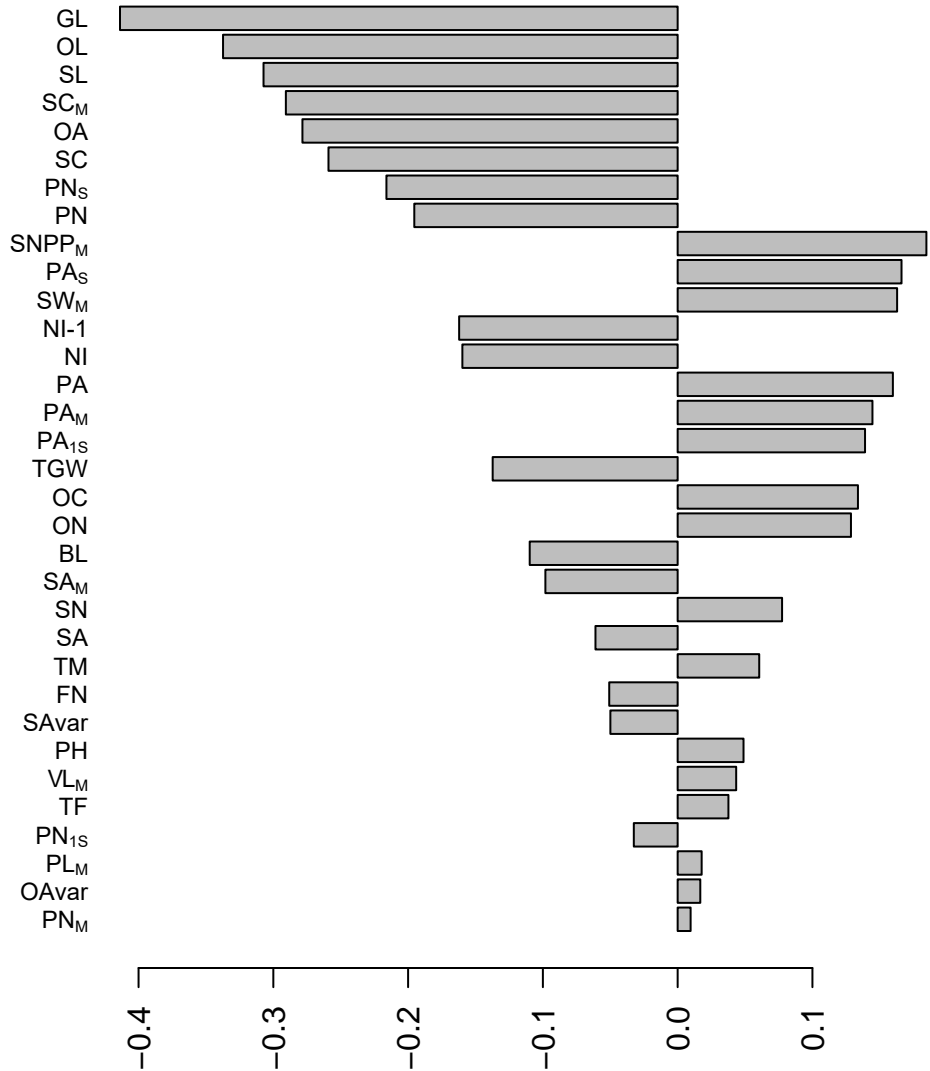

# PC6<sub>alltraits</sub>

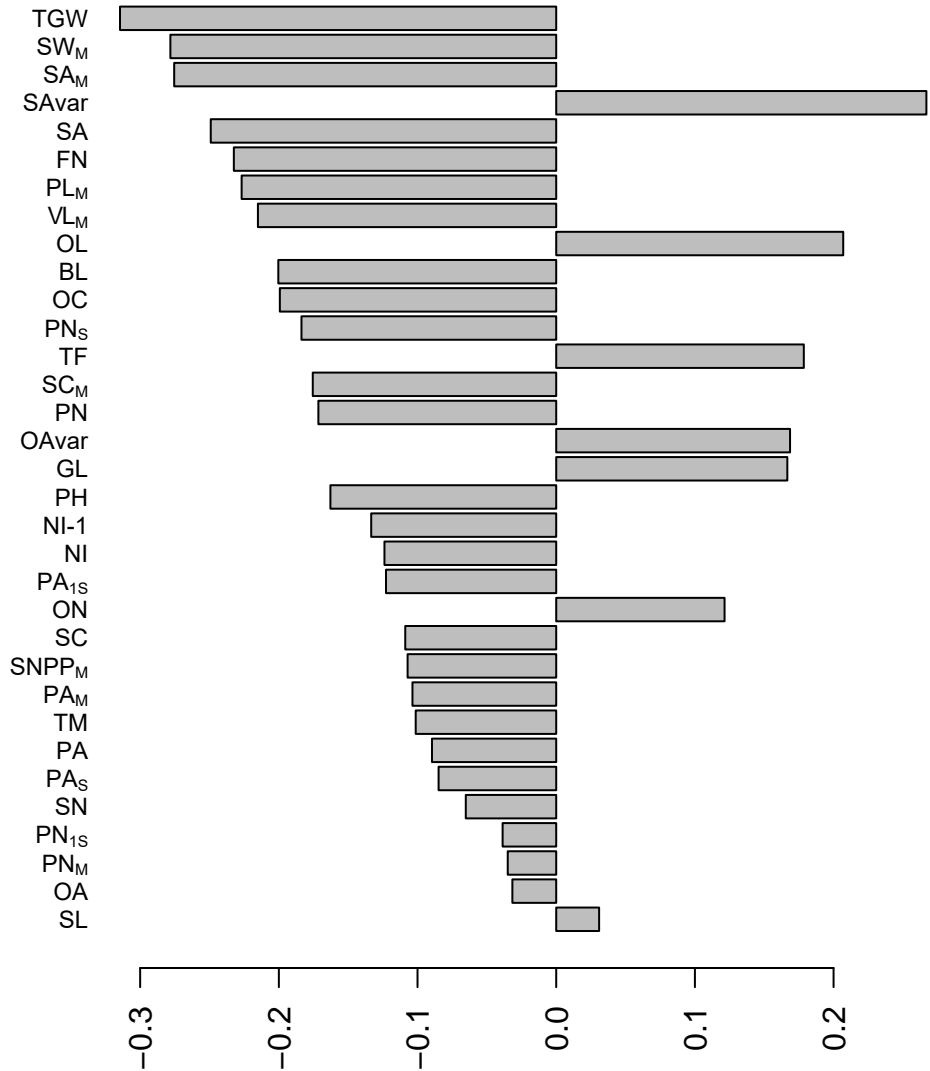

# PC7<sub>alltraits</sub>

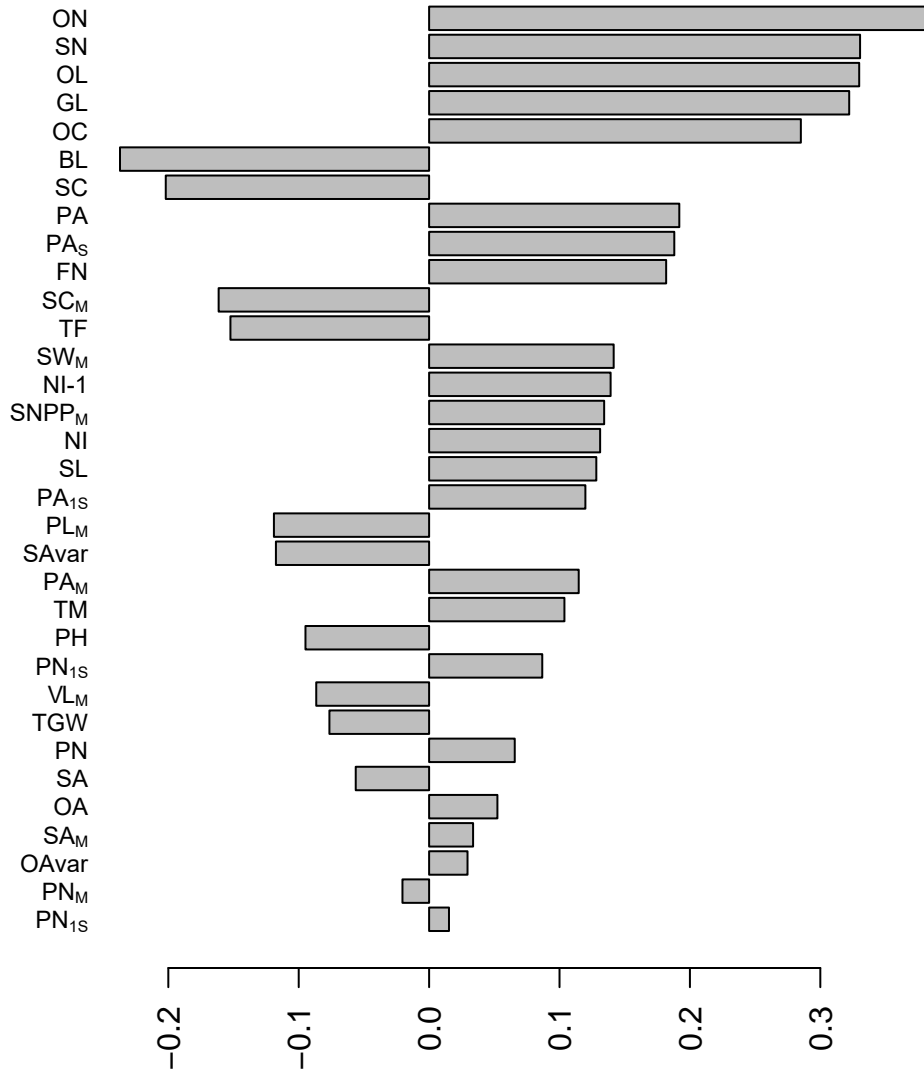



# PC8<sub>alltraits</sub>

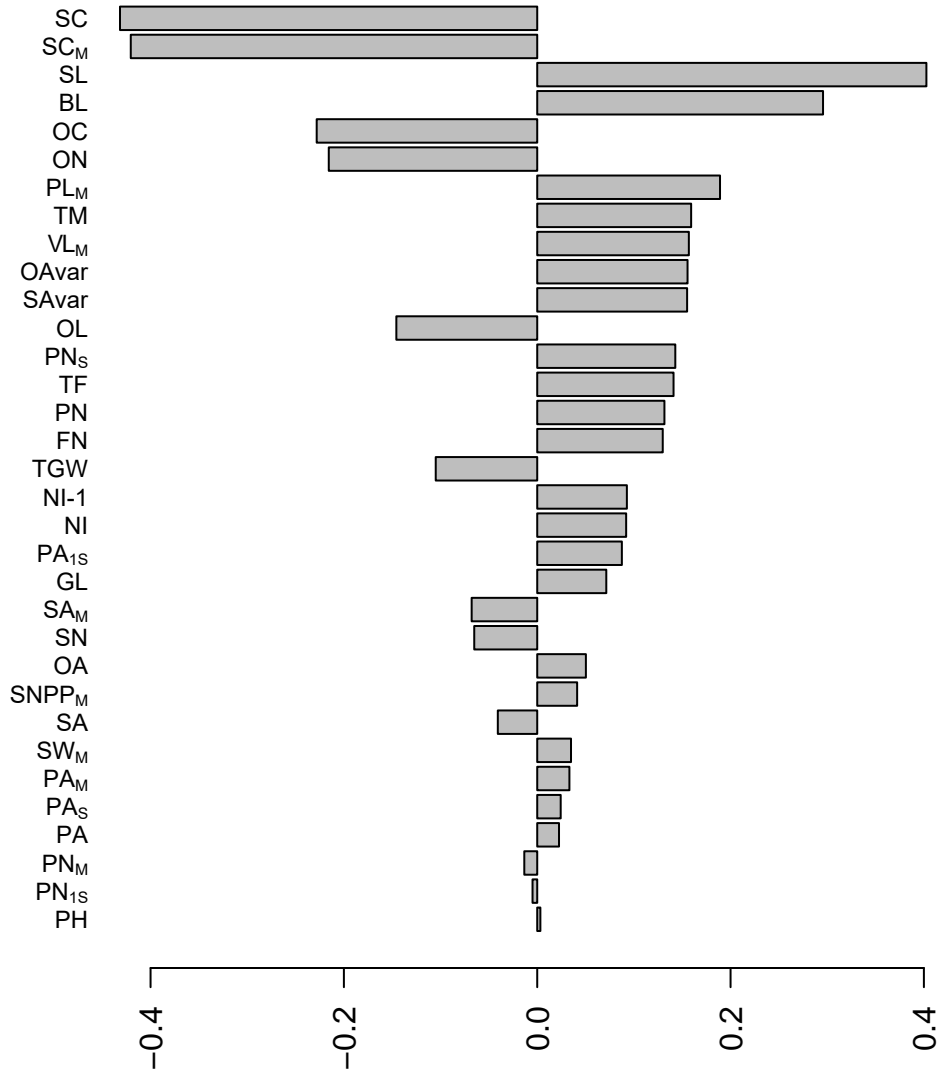

# PC9<sub>alltraits</sub>

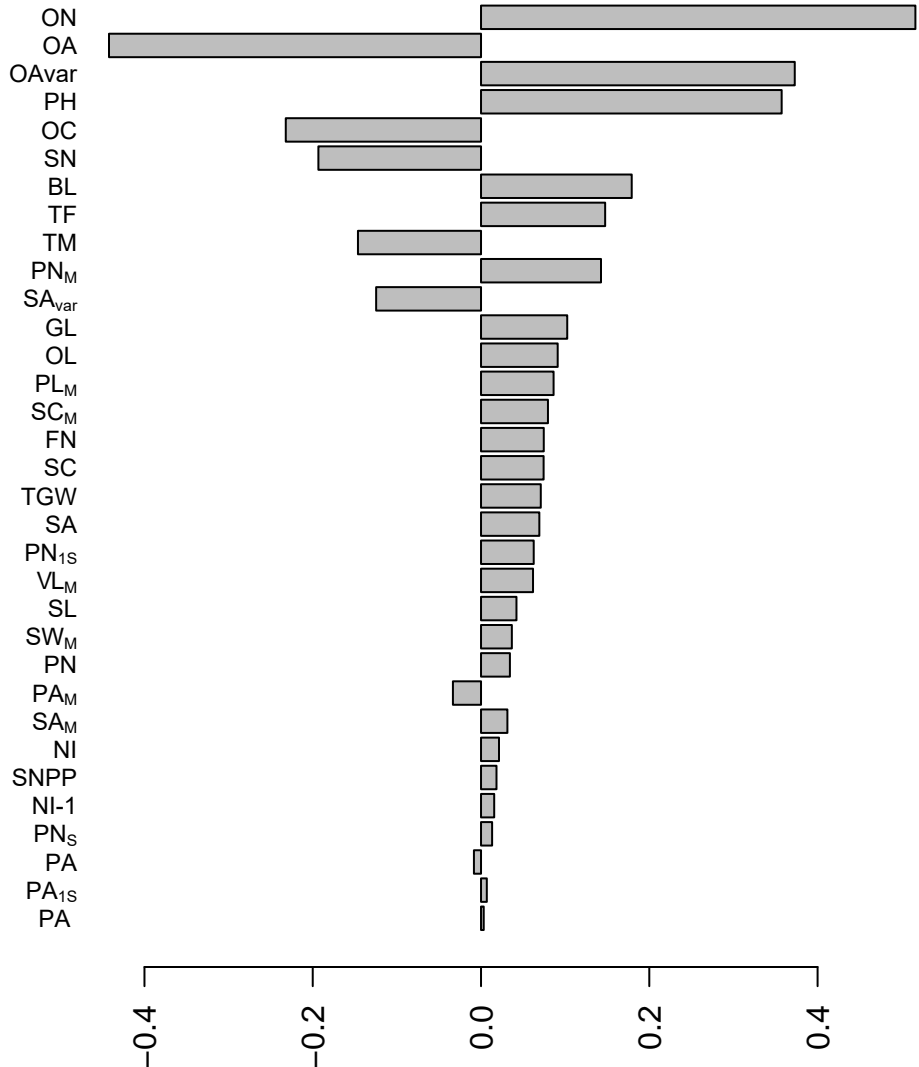

# PC10<sub>alltraits</sub>

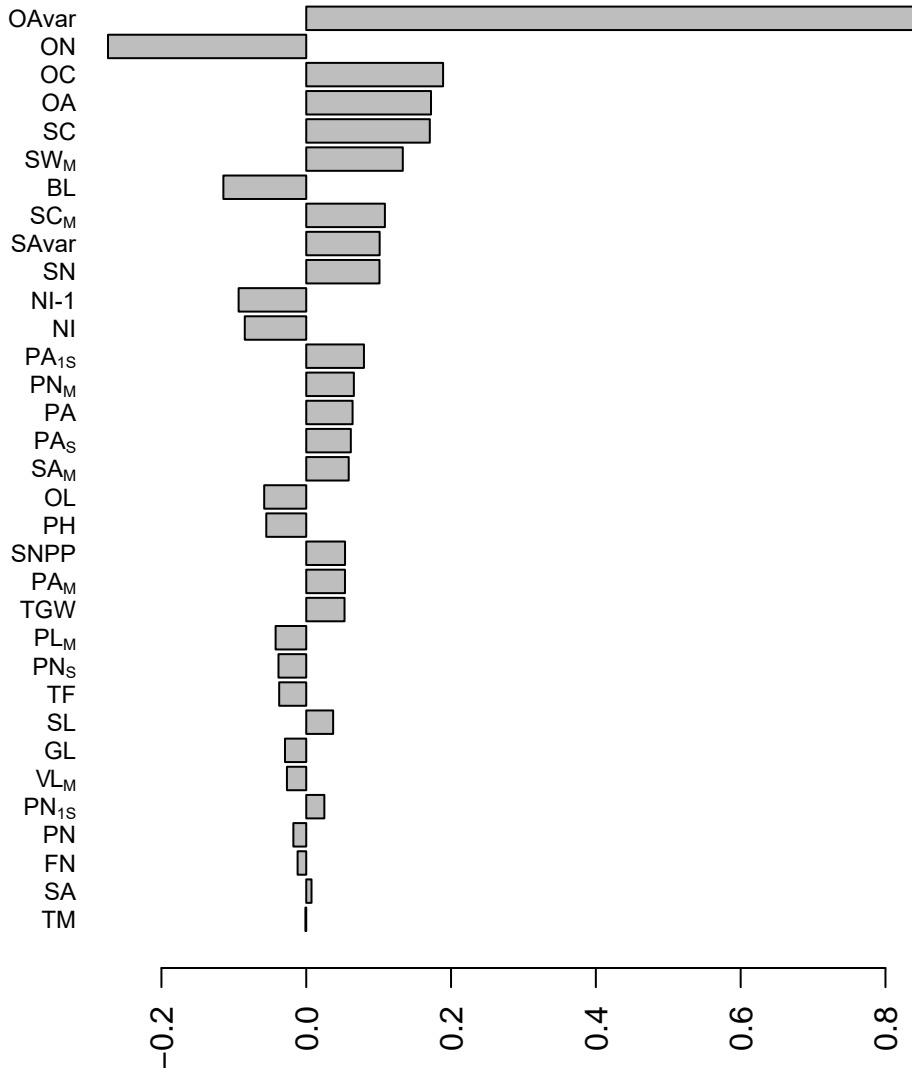

# PC13<sub>alltraits</sub>

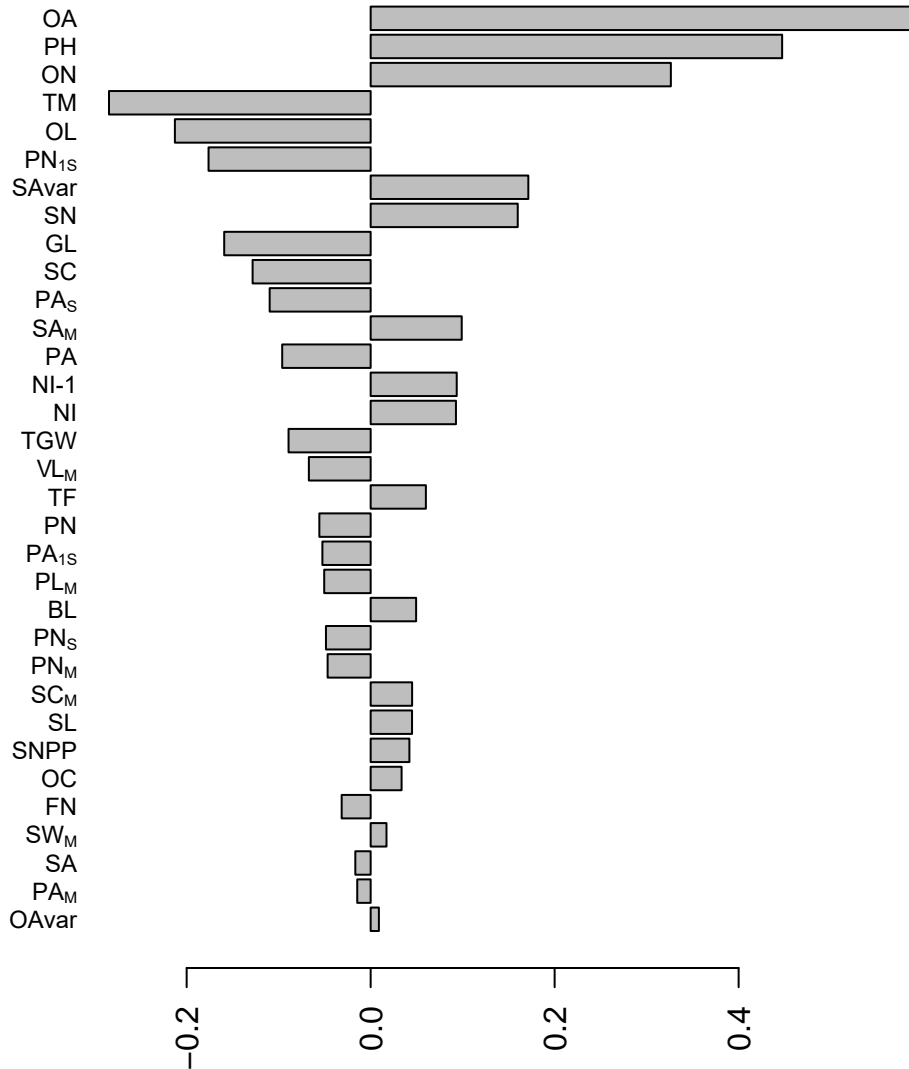

# PC14<sub>alltraits</sub>

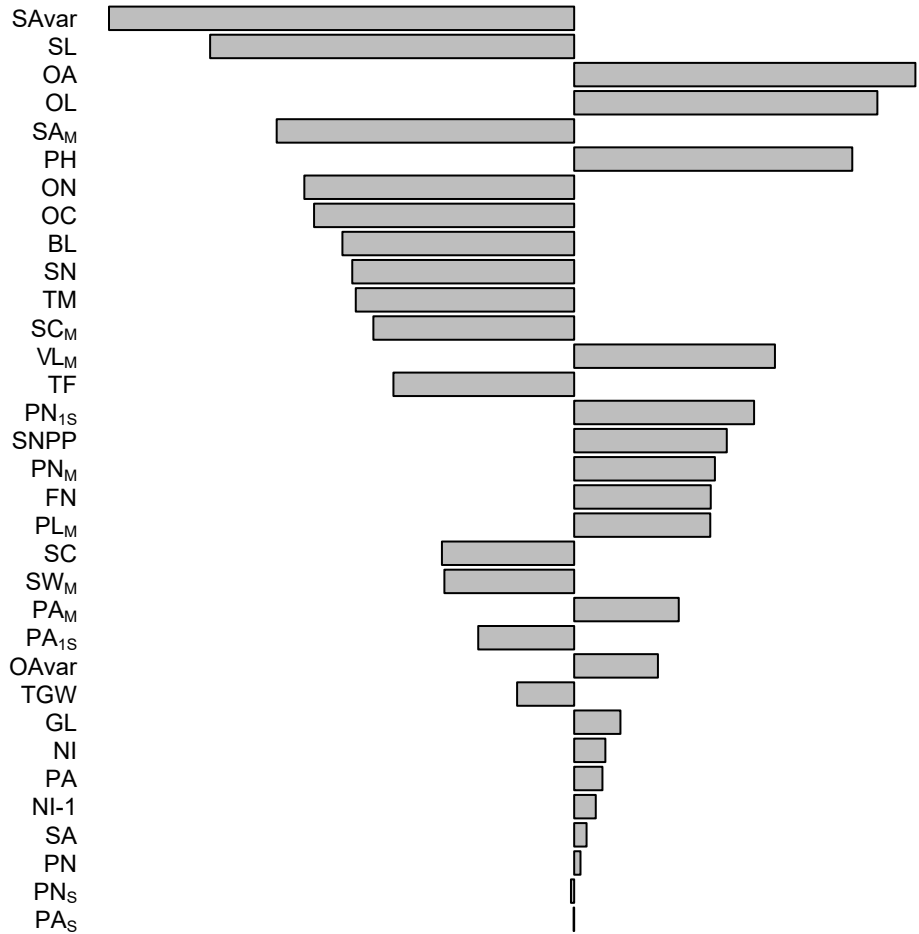

# PC15<sub>alltraits</sub>

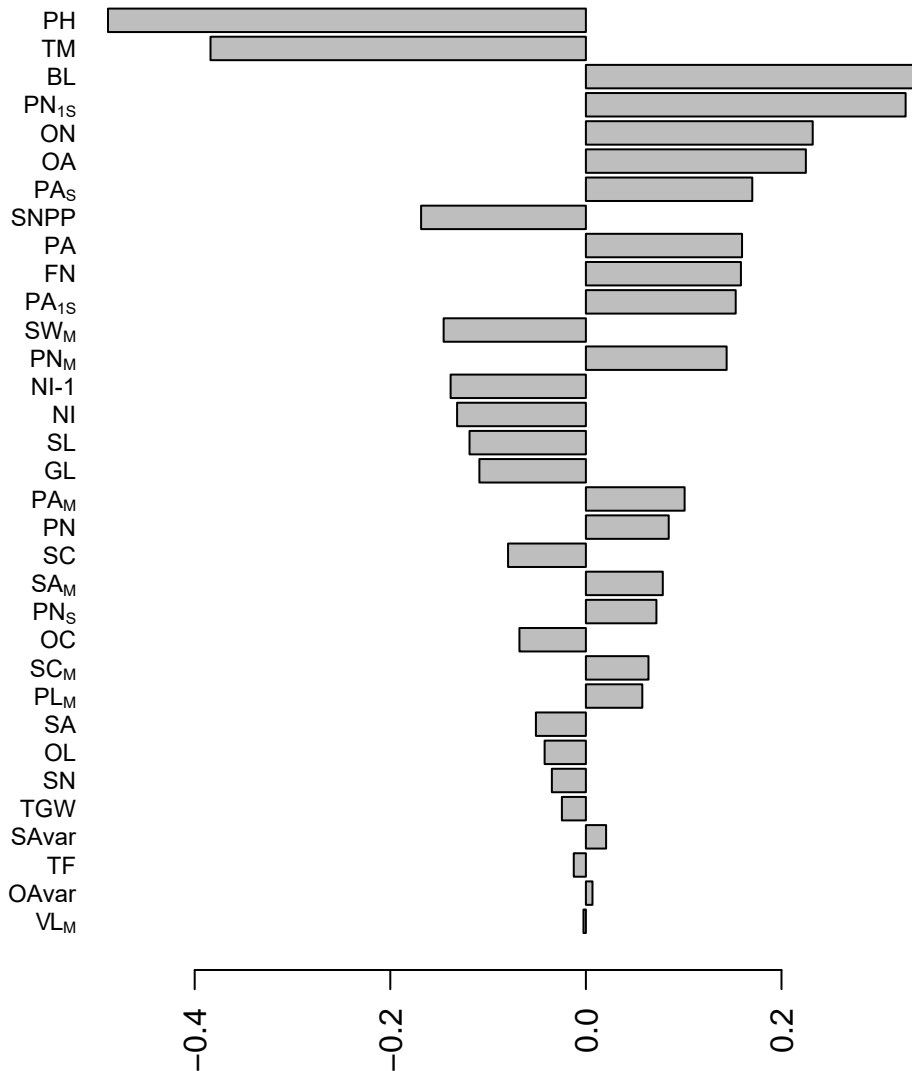



Supplementary Table S1: List of 96 genotypes included in the diversity set population. The ASSYST code, genotype names, crop type description and the 4 oilseed rape groups are presented.

| <b>ASSYST code</b> | <b>Genotype names</b>     | <b>Crop type description</b> | <b>Four OSR groups</b> |
|--------------------|---------------------------|------------------------------|------------------------|
| BnASSYST-213       | Abukuma Natane            | Winter OSR                   | Winter OSR             |
| BnASSYST-418       | Alta Sweet                | Swede                        | Other                  |
| BnASSYST-040       | Apex                      | Modern winter OSR            | Winter OSR             |
| BnASSYST-090       | Apex-93_5 x Ginyou_3 DH   | Winter OSR                   | Winter OSR             |
| BnASSYST-190       | Aphid Resistant Rape      | Winter fodder                | Other                  |
| BnASSYST-133       | Baltia                    | Winter OSR                   | Winter OSR             |
| BnASSYST-091       | Bienvenu DH4              | Winter OSR                   | Winter OSR             |
| BnASSYST-206       | Brauner Schnitikohl       | Siberian kale                | Other                  |
| BnASSYST-273       | Bronowski                 | Spring OSR                   | Spring OSR             |
| BnASSYST-509       | Cabernet                  | Winter OSR                   | Winter OSR             |
| BnASSYST-510       | Cabriolet                 | Winter OSR                   | Winter OSR             |
| BnASSYST-185       | Canard                    | Winter fodder                | Other                  |
| BnASSYST-093       | Canberra x Courage        | Winter OSR                   | Winter OSR             |
| BnASSYST-028       | Capitol                   | Modern winter OSR            | Winter OSR             |
| BnASSYST-511       | Castille                  | Winter OSR                   | Winter OSR             |
| BnASSYST-512       | Catana                    | Winter OSR                   | Winter OSR             |
| BnASSYST-274       | Ceska Krajova             | Spring OSR                   | Spring OSR             |
| BnASSYST-207       | Chembere Dzagumhana       | Unspecified                  | Other                  |
| BnASSYST-513       | Chuanyou 2                | Semiwinter OSR               | Semiwinter OSR         |
| BnASSYST-137       | Coriander                 | Winter OSR                   | Winter OSR             |
| BnASSYST-208       | Couve Nabica              | Cauve nabica                 | Other                  |
| BnASSYST-245       | Cresor                    | Spring OSR                   | Spring OSR             |
| BnASSYST-261       | Cubs Root                 | Spring OSR                   | Spring OSR             |
| BnASSYST-514       | Dimension                 | Winter OSR                   | Winter OSR             |
| BnASSYST-139       | Dippes                    | Winter OSR                   | Winter OSR             |
| BnASSYST-238       | Drakkar                   | Spring OSR                   | Spring OSR             |
| BnASSYST-275       | Duplo                     | Spring OSR                   | Spring OSR             |
| BnASSYST-193       | Dwarf Essex               | Winter fodder                | Other                  |
| BnASSYST-194       | English Giant             | Winter fodder                | Other                  |
| BnASSYST-263       | Erglu                     | Spring OSR                   | Spring OSR             |
| BnASSYST-101       | Eurol                     | Winter OSR                   | Winter OSR             |
| BnASSYST-515       | Excalibur                 | Winter OSR                   | Winter OSR             |
| BnASSYST-055       | Expert                    | Modern winter OSR            | Winter OSR             |
| BnASSYST-516       | Flash                     | Winter OSR                   | Winter OSR             |
| BnASSYST-218       | Groene Groninger Snijmoes | Unspecified                  | Other                  |
| BnASSYST-096       | Hansen x Gaspard DH       | Winter OSR                   | Winter OSR             |
| BnASSYST-264       | Helios                    | Spring OSR                   | Spring OSR             |
| BnASSYST-410       | Huguenot                  | Swede                        | Other                  |
| BnASSYST-517       | Huron x Navajo            | Winter OSR                   | Winter OSR             |

| <b>ASSYST code</b> | <b>Genotype names</b>      | <b>Crop type description</b> | <b>Four OSR groups</b> |
|--------------------|----------------------------|------------------------------|------------------------|
| BnASSYST-518       | Inca x Contact             | Winter OSR                   | Winter OSR             |
| BnASSYST-107       | Janetzki Schlesischer      | Winter OSR                   | Winter OSR             |
| BnASSYST-411       | Jaune A Collet Vert        | Swede                        | Other                  |
| BnASSYST-251       | Karat                      | Spring OSR                   | Spring OSR             |
| BnASSYST-256       | Karoo-057 DH               | Spring OSR                   | Spring OSR             |
| BnASSYST-150       | Kromerska                  | Winter OSR                   | Winter OSR             |
| BnASSYST-108       | Lembkes Malchower (Lenora) | Winter OSR                   | Winter OSR             |
| BnASSYST-102       | Lesira                     | Winter OSR                   | Winter OSR             |
| BnASSYST-105       | Licrown x Express DH       | Winter OSR                   | Winter OSR             |
| BnASSYST-271       | Liho                       | Spring fodder                | Other                  |
| BnASSYST-097       | Madrigal x Recital DH      | Winter OSR                   | Winter OSR             |
| BnASSYST-160       | Matador                    | Winter OSR                   | Winter OSR             |
| BnASSYST-268       | Mazowiecki                 | Spring OSR                   | Spring OSR             |
| BnASSYST-186       | Moana, Moana Rape          | Winter fodder                | Other                  |
| BnASSYST-257       | Monty-028 DH               | Spring OSR                   | Spring OSR             |
| BnASSYST-259       | N02D-1952                  | Spring OSR                   | Spring OSR             |
| BnASSYST-520       | Ningyou 7                  | Semiwinter OSR               | Semiwinter OSR         |
| BnASSYST-258       | N01D-1330                  | Spring OSR                   | Spring OSR             |
| BnASSYST-109       | Norin                      | Winter OSR                   | Winter OSR             |
| BnASSYST-521       | Palmedor                   | Winter OSR                   | Winter OSR             |
| BnASSYST-522       | POH 285, Bolko             | Winter OSR                   | Winter OSR             |
| BnASSYST-204       | Q100                       | Synthetic                    | Other                  |
| BnASSYST-523       | Quinta                     | Winter OSR                   | Winter OSR             |
| BnASSYST-098       | Rafal DH1                  | Winter OSR                   | Winter OSR             |
| BnASSYST-209       | Ragged Jack                | Rape kale                    | Other                  |
| BnASSYST-168       | Ramses                     | Winter OSR                   | Winter OSR             |
| BnASSYST-221       | Rapid Cycling Rape (CrGC5) | Rape kale                    | Other                  |
| BnASSYST-524       | Rocket                     | Winter OSR                   | Winter OSR             |
| BnASSYST-113       | Samourai                   | Winter OSR                   | Winter OSR             |
| BnASSYST-414       | Sensation Nz               | Swede                        | Other                  |
| BnASSYST-106       | Shannon x Winner DH        | Winter OSR                   | Winter OSR             |
| BnASSYST-526       | Shengliyoucai              | Semiwinter OSR               | Semiwinter OSR         |
| BnASSYST-211       | Siberische Boerenkool      | Siberian kale                | Other                  |
| BnASSYST-212       | Slapska, Slapy             | Unspecified                  | Other                  |
| BnASSYST-172       | Slovenska Krajova          | Winter OSR                   | Winter OSR             |
| BnASSYST-239       | Stellar DH                 | Spring OSR                   | Spring OSR             |
| BnASSYST-260       | Surpass400-024 DH          | Spring OSR                   | Spring OSR             |
| BnASSYST-229       | SWU Chinese 1              | Semiwinter OSR               | Semiwinter OSR         |
| BnASSYST-230       | SWU Chinese 2              | Semiwinter OSR               | Semiwinter OSR         |
| BnASSYST-203       | Taisetsu                   | Winter vegetable             | Other                  |
| BnASSYST-269       | Tantal                     | Spring OSR                   | Spring OSR             |
| BnASSYST-099       | Tapidor DH                 | Winter OSR                   | Winter OSR             |
| BnASSYST-527       | Temple                     | Winter OSR                   | Winter OSR             |

| <b>ASSYST code</b> | <b>Genotype names</b> | <b>Crop type description</b> | <b>Four OSR groups</b> |
|--------------------|-----------------------|------------------------------|------------------------|
| BnASSYST-436       | Tina                  | Swede                        | Other                  |
| BnASSYST-283       | Topas                 | Spring OSR                   | Spring OSR             |
| BnASSYST-307       | Tribune               | Spring OSR                   | Spring OSR             |
| BnASSYST-053       | Verona                | Modern winter OSR            | Winter OSR             |
| BnASSYST-401       | Vige DH1              | Swede                        | Other                  |
| BnASSYST-528       | Vision                | Winter OSR                   | Winter OSR             |
| BnASSYST-270       | Weihenstephaner       | Spring OSR                   | Spring OSR             |
| BnASSYST-240       | Westar DH             | Spring OSR                   | Spring OSR             |
| BnASSYST-448       | Wilhelmberger         | Swede                        | Other                  |
| BnASSYST-394       | Willi                 | Spring OSR                   | Spring OSR             |
| BnASSYST-529       | Xiangyou 15           | Semiwinter OSR               | Semiwinter OSR         |
| BnASSYST-438       | York                  | Swede                        | Other                  |
| BnASSYST-530       | Zhongshuang II        | Semiwinter OSR               | Semiwinter OSR         |
| BnASSYST-237       | Zhouyou               | Semiwinter OSR               | Semiwinter OSR         |

Supplementary Table S2. List of transformations applied in order to satisfy homogeneity of variances.

| Trait                                                     | Transformation              |
|-----------------------------------------------------------|-----------------------------|
| Plant height                                              | square root                 |
| Number of flowering inflorescences                        | natural log                 |
| Number of secondary inflorescences                        | natural log                 |
| Number of flowers on the whole plant                      | natural log                 |
| Number of pods on secondary inflorescences                | square root                 |
| Number of pods on the whole plant                         | square root                 |
| Pod abortion on the main inflorescence                    | logit with offset           |
| Pod abortion in secondary inflorescences                  | logit with offset           |
| Pod abortion in the whole plant                           | logit with offset           |
| Ovary length                                              | natural log                 |
| Time to maturity                                          | natural log                 |
| Seed area from 10 pods from the main inflorescence        | natural log                 |
| Seed compactness from 10 pods from the main inflorescence | logit                       |
| Seed area from the whole plant                            | natural log                 |
| Seed compactness from the whole plant                     | logit                       |
| Estimated total seed number from the whole plant (by TGW) | natural log                 |
| Seed oil content from the whole plant                     | logit, with reference of 50 |

Supplementary Table S3. Summary statistics over the whole population of plants. These include the mean, standard deviation (SD), the minimum (Min), maximum (Max), coefficient of variation (%CV) and heritability. All summaries have been calculated on the adjusted data backtransformed to the original scale. Heritability calculations have been done according to the formula,  $H^2 = \text{Var}(\text{Gene}) / (\text{Var}(\text{Gene}) + \text{Var}(\text{Env}))$ , where  $\text{Var}(\text{Gene})$  is the variance of the accession means and  $\text{Var}(\text{Env})$  is the residual variance after fitting  $\text{Trait} \sim \text{Line}$ .

| Trait             | Mean     | SD       | Min      | Max      | CV (%)   | Heritability |
|-------------------|----------|----------|----------|----------|----------|--------------|
| ON                | 33.42061 | 4.232212 | 21.09133 | 44.20224 | 12.66348 | 0.712146     |
| OA                | 0.115021 | 0.01372  | 0.084351 | 0.172506 | 11.92822 | 0.708638     |
| OL                | 4.85204  | 0.501377 | 3.123429 | 6.385621 | 10.33333 | 0.73875      |
| GL                | 7.15939  | 0.654244 | 5.181047 | 9.601502 | 9.138268 | 0.668383     |
| SL                | 2.059846 | 0.315774 | 1.10426  | 3.20125  | 15.32999 | 0.678755     |
| BL                | 1.105276 | 0.297884 | 0.389241 | 2.615999 | 26.95113 | 0.725864     |
| OAcvar            | 13.29828 | 3.016598 | 7.609162 | 28.03759 | 22.68412 | 0.340075     |
| SY                | 13.83104 | 5.112593 | -0.36286 | 30.23625 | 36.96463 | 0.691789     |
| SW <sub>M</sub>   | 0.660528 | 0.298372 | -0.01849 | 1.795235 | 45.17171 | 0.559951     |
| PN                | 293.8627 | 130.0789 | 0.168818 | 880.1546 | 44.26519 | 0.525376     |
| PN <sub>M</sub>   | 56.82148 | 22.56691 | -3.10876 | 173.7208 | 39.71547 | 0.689118     |
| PN <sub>S</sub>   | 236.7674 | 121.5519 | 0.254323 | 827.3232 | 51.3381  | 0.499573     |
| PL                | 6.009025 | 1.640704 | 1.651364 | 15.12342 | 27.30401 | 0.646169     |
| PH                | 169.7785 | 27.88982 | 77.19692 | 288.8851 | 16.42719 | 0.73413      |
| NI                | 9.868905 | 5.373592 | 1.997105 | 55.1263  | 54.44973 | 0.444512     |
| NI-1              | 8.861261 | 5.369695 | 0.999851 | 53.90475 | 60.59741 | 0.446073     |
| PA <sub>M</sub>   | 28.64068 | 18.0737  | 1.621496 | 98.69986 | 63.10501 | 0.535236     |
| PA <sub>S</sub>   | 36.12051 | 17.59907 | 0.257428 | 99.86433 | 48.72319 | 0.566792     |
| PA                | 34.62878 | 17.25387 | 0.22769  | 99.8836  | 49.82523 | 0.585134     |
| FN                | 492.5712 | 277.9977 | 127.2368 | 2425.945 | 56.43808 | 0.51106      |
| OC                | 40.97465 | 6.398335 | 6.915751 | 49.93014 | 15.61535 | 0.668214     |
| SA <sub>M</sub>   | 3.131293 | 0.572851 | 1.915669 | 4.979786 | 18.29438 | 0.81349      |
| SC <sub>M</sub>   | 0.900709 | 0.035014 | 0.767028 | 0.958851 | 3.887397 | 0.745762     |
| SA                | 3.220794 | 0.578646 | 1.930691 | 5.160534 | 17.96594 | 0.80768      |
| SC                | 0.908333 | 0.027741 | 0.803544 | 0.954271 | 3.054045 | 0.754221     |
| PA <sub>15</sub>  | 36.24879 | 16.76044 | -0.02158 | 100.2386 | 46.23723 | 0.572836     |
| PN <sub>15</sub>  | 30.28568 | 12.65935 | -0.55818 | 80.86194 | 41.7998  | 0.737021     |
| TGW               | 4.669622 | 1.153336 | 2.128937 | 8.280727 | 24.69869 | 0.778309     |
| SN                | 3187.737 | 1301.984 | 163.2147 | 6516.371 | 40.84353 | 0.713307     |
| TF                | 102.8675 | 8.794261 | 87.99308 | 157.6276 | 8.549116 | 0.828945     |
| TM                | 244.7853 | 14.77247 | 177.6758 | 270.7309 | 6.034871 | 0.746385     |
| SAcvar            | 12.81114 | 3.075966 | 2.959941 | 30.21332 | 24.01009 | 0.556595     |
| SNPP <sub>M</sub> | 14.48374 | 6.561572 | 0.332819 | 30.44099 | 45.30301 | 0.584962     |
| VL                | 4.891266 | 1.432629 | 1.218655 | 12.67863 | 29.28953 | 0.640372     |

Supplementary Table S5. Ranks the Winter OSR genotypes according to its position within each PC<sub>macro</sub>

(n=5).

| Genotypes                  | Seed yield (g) | PC1 <sub>macro</sub> | PC5 <sub>macro</sub> | PC6 <sub>macro</sub> | PC7 <sub>macro</sub> |
|----------------------------|----------------|----------------------|----------------------|----------------------|----------------------|
| POH 285, Bolko             | 21.29          | 18                   | 24                   | 30                   | 34                   |
| Canberra x Courage         | 20.46          | 4                    | 26                   | 4                    | 21                   |
| Norin                      | 20.42          | 9                    | 8                    | 32                   | 6                    |
| Shannon x Winner DH        | 20.28          | 25                   | 1                    | 31                   | 8                    |
| Verona                     | 20.21          | 11                   | 7                    | 7                    | 26                   |
| Rafal DH1                  | 19.98          | 7                    | 9                    | 1                    | 38                   |
| Rocket                     | 19.50          | 3                    | 40                   | 5                    | 3                    |
| Madrigal x Recital DH      | 19.39          | 19                   | 32                   | 18                   | 4                    |
| Capitol                    | 19.04          | 26                   | 12                   | 8                    | 22                   |
| Hansen x Gaspard DH        | 18.85          | 13                   | 16                   | 38                   | 10                   |
| Inca x Contact             | 18.76          | 8                    | 29                   | 16                   | 7                    |
| Expert                     | 18.75          | 5                    | 30                   | 9                    | 17                   |
| Huron x Navajo             | 18.41          | 1                    | 27                   | 14                   | 13                   |
| Matador                    | 18.32          | 2                    | 10                   | 2                    | 11                   |
| Licrown x Express DH       | 18.21          | 33                   | 28                   | 6                    | 27                   |
| Eurol                      | 17.80          | 16                   | 2                    | 22                   | 35                   |
| Vision                     | 17.32          | 10                   | 22                   | 39                   | 14                   |
| Temple                     | 17.26          | 12                   | 35                   | 12                   | 2                    |
| Dimension                  | 17.06          | 23                   | 19                   | 11                   | 29                   |
| Cabernet                   | 16.75          | 21                   | 39                   | 17                   | 9                    |
| Dippes                     | 16.64          | 6                    | 41                   | 20                   | 15                   |
| Coriander                  | 16.41          | 22                   | 38                   | 29                   | 28                   |
| Apex-93_5 x Ginyou_3 DH    | 16.25          | 28                   | 20                   | 36                   | 25                   |
| Abukuma Natane             | 16.10          | 24                   | 4                    | 35                   | 37                   |
| Palmedor                   | 15.91          | 20                   | 21                   | 26                   | 1                    |
| Apex                       | 15.85          | 38                   | 15                   | 34                   | 12                   |
| Lembkes Malchower (Lenora) | 15.26          | 14                   | 23                   | 23                   | 33                   |
| Baltia                     | 15.09          | 31                   | 3                    | 40                   | 32                   |
| Cabriolet                  | 14.98          | 15                   | 34                   | 15                   | 36                   |
| Tapidor DH                 | 14.87          | 35                   | 18                   | 24                   | 20                   |
| Kromerska                  | 14.50          | 34                   | 6                    | 19                   | 18                   |
| Slovenska Krajova          | 14.46          | 29                   | 17                   | 25                   | 19                   |
| Castille                   | 14.07          | 39                   | 5                    | 42                   | 23                   |
| Ramses                     | 13.70          | 17                   | 37                   | 28                   | 30                   |
| Lesira                     | 13.58          | 36                   | 33                   | 13                   | 40                   |
| Excalibur                  | 13.03          | 40                   | 13                   | 27                   | 5                    |
| Quinta                     | 13.02          | 30                   | 25                   | 41                   | 41                   |
| Samourai                   | 12.51          | 27                   | 36                   | 3                    | 42                   |
| Catana                     | 11.58          | 37                   | 42                   | 10                   | 39                   |
| Janetzki Schlesi           | 11.34          | 32                   | 31                   | 21                   | 31                   |
| Bienvenu DH4               | 10.80          | 41                   | 14                   | 37                   | 24                   |
| Flash                      | 5.38           | 42                   | 11                   | 33                   | 16                   |

Supplementary Table S6. Ranks the Spring OSR genotypes according to its position within each PC<sub>macro</sub> (n=5).

| Genotype          | Seed yield (g) | PC1 <sub>macro</sub> | PC5 <sub>macro</sub> | PC6 <sub>macro</sub> | PC7 <sub>macro</sub> |
|-------------------|----------------|----------------------|----------------------|----------------------|----------------------|
| Mazowiecki        | 15.99          | 1                    | 1                    | 14                   | 19                   |
| Cresor            | 15.85          | 4                    | 11                   | 18                   | 10                   |
| Tantal            | 15.83          | 10                   | 8                    | 7                    | 8                    |
| Westar DH         | 14.99          | 5                    | 14                   | 6                    | 2                    |
| Erglu             | 14.82          | 11                   | 2                    | 19                   | 12                   |
| Ceska Krajova     | 14.70          | 6                    | 15                   | 11                   | 1                    |
| N01D-1330         | 14.42          | 3                    | 9                    | 17                   | 9                    |
| Topas             | 13.90          | 15                   | 6                    | 12                   | 3                    |
| Willi             | 13.88          | 12                   | 10                   | 10                   | 16                   |
| Duplo             | 13.48          | 7                    | 18                   | 20                   | 4                    |
| Bronowski         | 13.43          | 8                    | 17                   | 8                    | 6                    |
| Tribune           | 13.10          | 9                    | 4                    | 4                    | 14                   |
| Drakkar           | 12.27          | 14                   | 3                    | 16                   | 21                   |
| Helios            | 10.34          | 16                   | 21                   | 5                    | 20                   |
| Karat             | 9.80           | 2                    | 16                   | 22                   | 22                   |
| Monty-028 DH      | 9.59           | 13                   | 22                   | 1                    | 17                   |
| N02D-1952         | 9.23           | 19                   | 5                    | 21                   | 11                   |
| Karoo-057 DH      | 8.82           | 17                   | 20                   | 2                    | 18                   |
| Surpass400-024 DH | 7.67           | 18                   | 13                   | 13                   | 13                   |
| Weihenstephaner   | 6.36           | 20                   | 12                   | 15                   | 5                    |
| Stellar DH        | 4.36           | 21                   | 19                   | 9                    | 15                   |
| Cubs Root         | 3.79           | 22                   | 7                    | 3                    | 7                    |

Supplementary Table S7: Ranks the Winter OSR genotypes according to its position within each PC<sub>alltraits</sub>

(n=3).

| Genotypes                  | Seed yield (g) | PC1 <sub>alltraits</sub> | PC6 <sub>alltraits</sub> | PC7 <sub>alltraits</sub> | PC10 <sub>alltraits</sub> |
|----------------------------|----------------|--------------------------|--------------------------|--------------------------|---------------------------|
| POH 285, Bolko             | 21.29          | 15                       | 17                       | 25                       | 20                        |
| Canberra x Courage         | 20.46          | 12                       | 20                       | 18                       | 18                        |
| Norin                      | 20.42          | 17                       | 1                        | 41                       | 8                         |
| Shannon x Winner DH        | 20.28          | 29                       | 4                        | 16                       | 15                        |
| Verona                     | 20.21          | 8                        | 7                        | 19                       | 6                         |
| Rafal DH1                  | 19.98          | 4                        | 5                        | 8                        | 21                        |
| Rocket                     | 19.50          | 1                        | 42                       | 2                        | 7                         |
| Madrigal x Recital DH      | 19.39          | 22                       | 28                       | 23                       | 14                        |
| Capitol                    | 19.04          | 23                       | 11                       | 7                        | 27                        |
| Hansen x Gaspard DH        | 18.85          | 11                       | 38                       | 14                       | 5                         |
| Inca x Contact             | 18.76          | 7                        | 29                       | 12                       | 29                        |
| Expert                     | 18.75          | 10                       | 30                       | 22                       | 4                         |
| Huron x Navajo             | 18.41          | 2                        | 25                       | 5                        | 9                         |
| Matador                    | 18.32          | 3                        | 18                       | 1                        | 22                        |
| Licrown x Express DH       | 18.21          | 32                       | 33                       | 3                        | 19                        |
| Eurol                      | 17.80          | 16                       | 2                        | 21                       | 25                        |
| Vision                     | 17.32          | 13                       | 36                       | 30                       | 2                         |
| Temple                     | 17.26          | 14                       | 32                       | 10                       | 30                        |
| Dimension                  | 17.06          | 19                       | 21                       | 9                        | 23                        |
| Cabernet                   | 16.75          | 5                        | 34                       | 13                       | 11                        |
| Dippes                     | 16.64          | 9                        | 27                       | 39                       | 33                        |
| Coriander                  | 16.41          | 28                       | 37                       | 11                       | 32                        |
| Apex-93_5 x Ginyou_3 DH    | 16.25          | 31                       | 24                       | 40                       | 1                         |
| Abukuma Natane             | 16.10          | 21                       | 14                       | 33                       | 13                        |
| Palmedor                   | 15.91          | 24                       | 10                       | 24                       | 16                        |
| Apex                       | 15.85          | 37                       | 16                       | 36                       | 3                         |
| Lembkes Malchower (Lenora) | 15.26          | 18                       | 22                       | 17                       | 26                        |
| Baltia                     | 15.09          | 25                       | 6                        | 38                       | 28                        |
| Cabriolet                  | 14.98          | 6                        | 31                       | 26                       | 41                        |
| Tapidor DH                 | 14.87          | 34                       | 41                       | 6                        | 35                        |
| Kromerska                  | 14.50          | 26                       | 3                        | 37                       | 10                        |
| Slovenska Krajova          | 14.46          | 33                       | 15                       | 32                       | 17                        |
| Castille                   | 14.07          | 38                       | 9                        | 27                       | 31                        |
| Ramses                     | 13.70          | 20                       | 39                       | 28                       | 36                        |
| Lesira                     | 13.58          | 39                       | 19                       | 35                       | 12                        |
| Excalibur                  | 13.03          | 41                       | 23                       | 4                        | 34                        |
| Quinta                     | 13.02          | 35                       | 13                       | 42                       | 39                        |
| Samourai                   | 12.51          | 27                       | 35                       | 20                       | 42                        |
| Catana                     | 11.58          | 36                       | 40                       | 34                       | 24                        |
| Janetzki Schlesischer      | 11.34          | 30                       | 26                       | 31                       | 37                        |
| Bienvenu DH4               | 10.80          | 40                       | 12                       | 29                       | 38                        |
| Flash                      | 5.38           | 42                       | 8                        | 15                       | 40                        |



Supplementary Table S8. Ranks the Spring OSR genotypes according to its position within each PC<sub>alltraits</sub>

(n=3).

| Genotype          | Seed yield (g) | PC1 <sub>alltraits</sub> | PC6 <sub>alltraits</sub> | PC7 <sub>alltraits</sub> | PC10 <sub>alltraits</sub> |
|-------------------|----------------|--------------------------|--------------------------|--------------------------|---------------------------|
| Mazowiecki        | 15.99          | 1                        | 2                        | 21                       | 8                         |
| Cresor            | 15.85          | 4                        | 15                       | 8                        | 17                        |
| Tantal            | 15.83          | 9                        | 1                        | 20                       | 16                        |
| Westar DH         | 14.99          | 6                        | 14                       | 6                        | 13                        |
| Erglu             | 14.82          | 7                        | 12                       | 3                        | 21                        |
| Ceska Krajova     | 14.70          | 11                       | 17                       | 9                        | 2                         |
| N01D-1330         | 14.42          | 3                        | 10                       | 13                       | 9                         |
| Topas             | 13.90          | 14                       | 6                        | 10                       | 7                         |
| Willi             | 13.88          | 12                       | 13                       | 17                       | 4                         |
| Duplo             | 13.48          | 8                        | 19                       | 5                        | 6                         |
| Bronowski         | 13.43          | 5                        | 21                       | 1                        | 15                        |
| Tribune           | 13.10          | 10                       | 7                        | 2                        | 19                        |
| Drakkar           | 12.27          | 15                       | 3                        | 14                       | 18                        |
| Helios            | 10.34          | 13                       | 11                       | 12                       | 12                        |
| Karat             | 9.80           | 2                        | 4                        | 22                       | 22                        |
| Monty-028 DH      | 9.59           | 16                       | 22                       | 11                       | 20                        |
| N02D-1952         | 9.23           | 18                       | 8                        | 16                       | 5                         |
| Karoo-057 DH      | 8.82           | 19                       | 20                       | 19                       | 10                        |
| Surpass400-024 DH | 7.67           | 17                       | 5                        | 7                        | 3                         |
| Weihenstephaner   | 6.36           | 20                       | 9                        | 15                       | 14                        |
| Stellar DH        | 4.36           | 21                       | 16                       | 18                       | 11                        |
| Cubs Root         | 3.79           | 22                       | 18                       | 4                        | 1                         |

SupplementaryTable S9. Percentage of seed yield variation explained by different Partial Least Square (PLS) components for macrotraits for WOSR and SOSR.

| Winter OSR     |                          | Spring OSR     |                          |
|----------------|--------------------------|----------------|--------------------------|
| PLS components | Seed yield variation (%) | PLS components | Seed yield variation (%) |
| 1              | 44.2                     | 1              | 74.0                     |
| 2              | 22.1                     | 2              | 9.7                      |
| 3              | 13.2                     | 3              | 5.9                      |
| 4              | 8.0                      | 4              | 2.0                      |
| 5              | 3.0                      | 5              | 1.9                      |
| 6              | 3.0                      | 6              | 1.1                      |
| 7              | 1.3                      | 7              | 1.2                      |
| 8              | 0.8                      | 8              | 0.9                      |
| 9              | 0.7                      | 9              | 0.6                      |

Supplementary Table S10: Percentage of seed yield variation explained by different Partial Least Square (PLS) components for all traits for WOSR and SOSR.

| Winter OSR     |                          | Spring OSR     |                          |
|----------------|--------------------------|----------------|--------------------------|
| PLS components | Seed yield variation (%) | PLS components | Seed yield variation (%) |
| 1              | 46.3                     | 1              | 74.8                     |
| 2              | 21.8                     | 2              | 8.7                      |
| 3              | 13.3                     | 3              | 5.5                      |
| 4              | 6.1                      | 4              | 3.3                      |
| 5              | 2.9                      | 5              | 1.4                      |
| 6              | 2.1                      | 6              | 1.2                      |
| 7              | 1.8                      | 7              | 1.2                      |
| 8              | 1.1                      | 8              | 0.7                      |
| 9              | 0.6                      |                |                          |
| 10             | 0.6                      |                |                          |
| 11             | 0.4                      |                |                          |

Supplementary Table S11: Partial Least Squares (PLS) regression coefficients for Winter OSR and Spring OSR for macrotraits.

| Trait                                                     | WOSR <sub>macro</sub> | SOSR <sub>macro</sub> |
|-----------------------------------------------------------|-----------------------|-----------------------|
| Estimated total seed number from the whole plant (by TGW) | 1.2948                | 1.078                 |
| Thousand grain weight                                     | 0.5633                | 0.3728                |
| Seed weight from 10 pods from the main inflorescence      | 0.1627                | 0.0763                |
| Number of pods on the whole plant                         | 0.1467                | -0.0787               |
| Number of pods on secondary inflorescences                | 0.1135                | 0.0106                |
| Pod abortion in the whole plant                           | 0.0453                | -0.0854               |
| Seed compactness from 10 pods from the main inflorescence | 0.0433                | -0.1274               |
| Seed area from the whole plant                            | 0.0426                | 0.0143                |
| Seed compactness from the whole plant                     | 0.0234                | 0.0655                |
| Number of pods on the main inflorescence                  | 0.0177                | -0.0613               |
| Time to flowering                                         | 0.0155                | -0.0345               |
| Pod abortion on the main inflorescence                    | 0.0149                | -0.0261               |
| Time to maturity                                          | 0.0117                | 0.0146                |
| Pod abortion on a secondary inflorescence                 | 0.0086                | 0.0434                |
| Valve length from 10 pods from the main inflorescence     | -0.0023               | -0.0053               |
| Seed area from 10 pods from the main inflorescence        | -0.0145               | 0.0809                |
| Seed oil content from the whole plant                     | -0.0242               | 0.1415                |
| Pod length from 10 pods from the main inflorescence       | -0.0303               | 0.0186                |
| Plant height (cm)                                         | -0.0305               | 0.0464                |
| Seed area coefficient of variation from whole plant       | -0.0334               | -0.005                |
| Pod abortion in secondary inflorescences                  | -0.0405               | -0.0079               |
| Seed number/ pod from 10 pods from the main inflorescence | -0.0548               | 0.0412                |
| Number of flowering inflorescences                        | -0.0799               | 0.0213                |
| Number of flowers on the whole plant                      | -0.0808               | 0.0381                |
| Number of secondary inflorescences                        | -0.087                | 0.0319                |
| Number of pods on a secondary inflorescence               | -0.1283               | 0.144                 |

Supplementary Table S12: Partial Least Squares (PLS) regression coefficients for Winter OSR and Spring OSR for alltraits.

| Trait                                                     | WOSR <sub>alltraits</sub> | SOSR <sub>alltraits</sub> |
|-----------------------------------------------------------|---------------------------|---------------------------|
| Estimated total seed number from the whole plant (by TGW) | 1.2759                    | 0.7794                    |
| Thousand grain weight                                     | 0.6184                    | 0.1006                    |
| Seed weight from 10 pods from the main inflorescence      | 0.2216                    | 0.1101                    |
| Number of pods on the whole plant                         | 0.1976                    | -0.0229                   |
| Number of pods on secondary inflorescences                | 0.1642                    | 0.0037                    |
| Pod abortion on a secondary inflorescence                 | 0.1336                    | 0.0971                    |
| Gynoecia length                                           | 0.0825                    | -0.008                    |
| Beak length                                               | 0.0521                    | -0.0388                   |
| Seed compactness from 10 pods from the main inflorescence | 0.039                     | -0.1582                   |
| Plant height (cm)                                         | 0.0228                    | 0.0459                    |
| Ovule area coefficient of variation                       | 0.02                      | 0.0028                    |
| Ovule area                                                | 0.0152                    | -0.003                    |
| Seed compactness from the whole plant                     | -0.0016                   | 0.077                     |
| Seed area coefficient of variation from whole plant       | -0.0047                   | 0.0497                    |
| Seed oil content from the whole plant                     | -0.0049                   | 0.342                     |
| Time to maturity                                          | -0.0112                   | 0.0734                    |
| Seed area from 10 pods from the main inflorescence        | -0.013                    | 0.1934                    |
| Time to flowering                                         | -0.0134                   | -0.1001                   |
| Pod abortion on the main inflorescence                    | -0.0136                   | 0.0679                    |
| Ovule number                                              | -0.0343                   | 0.0819                    |
| Pod abortion in the whole plant                           | -0.0511                   | -0.0827                   |
| Number of pods on the main inflorescence                  | -0.0513                   | 0.087                     |
| Pod length from 10 pods from the main inflorescence       | -0.0549                   | 0.0639                    |
| Style length                                              | -0.0581                   | 0.014                     |
| Ovary length                                              | -0.0616                   | -0.001                    |
| Valve length from 10 pods from the main inflorescence     | -0.0709                   | 0.0626                    |
| Pod abortion in secondary inflorescences                  | -0.0759                   | -0.0652                   |
| Seed area from the whole plant                            | -0.0867                   | -0.0064                   |
| Seed number/ pod from 10 pods from the main inflorescence | -0.0927                   | -0.0529                   |
| Number of flowering inflorescences                        | -0.0987                   | -0.0434                   |
| Number of secondary inflorescences                        | -0.1139                   | -0.0347                   |
| Number of flowers on the whole plant                      | -0.1325                   | 0.1707                    |
| Number of pods on a secondary inflorescence               | -0.1633                   | 0.1171                    |
